# Supplementary material for: Rapid and accurate estimation of protein–ligand relative binding affinities using site-identification by ligand competitive saturation
Source: Royal Society of Chemistry journal article supplement (doi:10.1039/d1sc01781k), 2021-01-01
Supplement: d1sc01781k5.xlsx [file d1sc01781k5.xlsx]

## Sheet: P38
scaffold 1	scaffold 2	scaffold 3		34 Ligands	training set 1	training set 2	Training set 3	training set 4	training set 5
p38_goldstein_01_2a_3fln	p38_goldstein_11_2k	p38_goldstein_02_2b_3flw			p38_goldstein_02_2b_3flw	p38_goldstein_01_2a_3fln	p38_goldstein_01_2a_3fln	p38_goldstein_01_2a_3fln	p38_goldstein_01_2a_3fln
p38_goldstein_03_2c	p38_goldstein_12_2l	p38_goldstein_22_2v			p38_goldstein_03_2c	p38_goldstein_02_2b_3flw	p38_goldstein_02_2b_3flw	p38_goldstein_02_2b_3flw	p38_goldstein_03_2c
p38_goldstein_04_2d_3flz	p38_goldstein_13_2m	p38_goldstein_23_2w_3fly			p38_goldstein_04_2d_3flz	p38_goldstein_04_2d_3flz	p38_goldstein_03_2c	p38_goldstein_03_2c	p38_goldstein_04_2d_3flz
p38_goldstein_05_2e	p38_goldstein_14_2n	p38_goldstein_24_2x			p38_goldstein_05_2e	p38_goldstein_05_2e	p38_goldstein_05_2e	p38_goldstein_04_2d_3flz	p38_goldstein_05_2e
p38_goldstein_06_2f	p38_goldstein_15_2o	p38_goldstein_25_2y			p38_goldstein_06_2f	p38_goldstein_06_2f	p38_goldstein_06_2f	p38_goldstein_06_2f	p38_goldstein_07_2g
p38_goldstein_07_2g	p38_goldstein_16_2p	p38_goldstein_26_2z			p38_goldstein_08_2h	p38_goldstein_07_2g	p38_goldstein_07_2g	p38_goldstein_07_2g	p38_goldstein_08_2h
p38_goldstein_08_2h	p38_goldstein_17_2q	p38_goldstein_27_2aa			p38_goldstein_09_2i	p38_goldstein_09_2i	p38_goldstein_08_2h	p38_goldstein_08_2h	p38_goldstein_09_2i
p38_goldstein_09_2i	p38_goldstein_18_2r	p38_goldstein_28_2bb			p38_goldstein_10_2j	p38_goldstein_10_2j	p38_goldstein_10_2j	p38_goldstein_09_2i	p38_goldstein_10_2j
p38_goldstein_10_2j	p38_goldstein_19_2s_s	p38_goldstein_29_2cc_3fls			p38_goldstein_11_2k	p38_goldstein_11_2k	p38_goldstein_11_2k	p38_goldstein_12_2l	p38_goldstein_11_2k
	p38_goldstein_20_2t	p38_goldstein_30_2dd_3flq			p38_goldstein_12_2l	p38_goldstein_12_2l	p38_goldstein_12_2l	p38_goldstein_13_2m	p38_goldstein_13_2m
	p38_goldstein_21_2u	p38_goldstein_31_2ee			p38_goldstein_14_2n	p38_goldstein_13_2m	p38_goldstein_13_2m	p38_goldstein_14_2n	p38_goldstein_14_2n
		p38_goldstein_32_2ff			p38_goldstein_15_2o	p38_goldstein_15_2o	p38_goldstein_14_2n	p38_goldstein_15_2o	p38_goldstein_15_2o
		p38_goldstein_33_2gg			p38_goldstein_16_2p	p38_goldstein_16_2p	p38_goldstein_16_2p	p38_goldstein_17_2q	p38_goldstein_16_2p
		p38_goldstein_34_2hh_3fmk			p38_goldstein_17_2q	p38_goldstein_17_2q	p38_goldstein_17_2q	p38_goldstein_18_2r	p38_goldstein_18_2r
		p38_goldstein_35_2ii_3fmh			p38_goldstein_19_2s_s	p38_goldstein_18_2r	p38_goldstein_18_2r	p38_goldstein_19_2s_s	p38_goldstein_19_2s_s
					p38_goldstein_20_2t	p38_goldstein_20_2t	p38_goldstein_19_2s_s	p38_goldstein_20_2t	p38_goldstein_20_2t
					p38_goldstein_21_2u	p38_goldstein_21_2u	p38_goldstein_21_2u	p38_goldstein_22_2v	p38_goldstein_21_2u
					p38_goldstein_23_2w_3fly	p38_goldstein_22_2v	p38_goldstein_22_2v	p38_goldstein_23_2w_3fly	p38_goldstein_22_2v
					p38_goldstein_24_2x	p38_goldstein_24_2x	p38_goldstein_23_2w_3fly	p38_goldstein_24_2x	p38_goldstein_23_2w_3fly
					p38_goldstein_25_2y	p38_goldstein_25_2y	p38_goldstein_25_2y	p38_goldstein_26_2z	p38_goldstein_24_2x
					p38_goldstein_26_2z	p38_goldstein_26_2z	p38_goldstein_26_2z	p38_goldstein_27_2aa	p38_goldstein_25_2y
					p38_goldstein_28_2bb	p38_goldstein_27_2aa	p38_goldstein_27_2aa	p38_goldstein_28_2bb	p38_goldstein_27_2aa
					p38_goldstein_30_2dd_3flq	p38_goldstein_30_2dd_3flq	p38_goldstein_28_2bb	p38_goldstein_30_2dd_3flq	p38_goldstein_28_2bb
					p38_goldstein_31_2ee	p38_goldstein_31_2ee	p38_goldstein_31_2ee	p38_goldstein_32_2ff	p38_goldstein_30_2dd_3flq
					p38_goldstein_32_2ff	p38_goldstein_32_2ff	p38_goldstein_32_2ff	p38_goldstein_33_2gg	p38_goldstein_31_2ee
					p38_goldstein_34_2hh_3fmk	p38_goldstein_33_2gg	p38_goldstein_33_2gg	p38_goldstein_34_2hh_3fmk	p38_goldstein_33_2gg
					p38_goldstein_35_2ii_3fmh	p38_goldstein_35_2ii_3fmh	p38_goldstein_34_2hh_3fmk	p38_goldstein_35_2ii_3fmh	p38_goldstein_34_2hh_3fmk
									p38_goldstein_35_2ii_3fmh
				35 Ligands	training set 1	training set 2	Training set 3	training set 4	training set 5
					p38_goldstein_02_2b_3flw	p38_goldstein_01_2a_3fln	p38_goldstein_01_2a_3fln	p38_goldstein_01_2a_3fln	p38_goldstein_01_2a_3fln
					p38_goldstein_03_2c	p38_goldstein_02_2b_3flw	p38_goldstein_02_2b_3flw	p38_goldstein_02_2b_3flw	p38_goldstein_03_2c
					p38_goldstein_04_2d_3flz	p38_goldstein_04_2d_3flz	p38_goldstein_03_2c	p38_goldstein_03_2c	p38_goldstein_04_2d_3flz
					p38_goldstein_05_2e	p38_goldstein_05_2e	p38_goldstein_05_2e	p38_goldstein_04_2d_3flz	p38_goldstein_05_2e
					p38_goldstein_06_2f	p38_goldstein_06_2f	p38_goldstein_06_2f	p38_goldstein_06_2f	p38_goldstein_07_2g
					p38_goldstein_08_2h	p38_goldstein_07_2g	p38_goldstein_07_2g	p38_goldstein_07_2g	p38_goldstein_08_2h
					p38_goldstein_09_2i	p38_goldstein_09_2i	p38_goldstein_08_2h	p38_goldstein_08_2h	p38_goldstein_09_2i
					p38_goldstein_10_2j	p38_goldstein_10_2j	p38_goldstein_10_2j	p38_goldstein_09_2i	p38_goldstein_10_2j
					p38_goldstein_11_2k	p38_goldstein_11_2k	p38_goldstein_11_2k	p38_goldstein_11_2k	p38_goldstein_12_2l
					p38_goldstein_13_2m	p38_goldstein_12_2l	p38_goldstein_12_2l	p38_goldstein_12_2l	p38_goldstein_13_2m
					p38_goldstein_14_2n	p38_goldstein_14_2n	p38_goldstein_13_2m	p38_goldstein_13_2m	p38_goldstein_14_2n
					p38_goldstein_15_2o	p38_goldstein_15_2o	p38_goldstein_15_2o	p38_goldstein_14_2n	p38_goldstein_15_2o
					p38_goldstein_16_2p	p38_goldstein_16_2p	p38_goldstein_16_2p	p38_goldstein_16_2p	p38_goldstein_17_2q
					p38_goldstein_18_2r	p38_goldstein_17_2q	p38_goldstein_17_2q	p38_goldstein_17_2q	p38_goldstein_18_2r
					p38_goldstein_19_2s_s	p38_goldstein_19_2s_s	p38_goldstein_18_2r	p38_goldstein_18_2r	p38_goldstein_19_2s_s
					p38_goldstein_20_2t	p38_goldstein_20_2t	p38_goldstein_20_2t	p38_goldstein_19_2s_s	p38_goldstein_20_2t
					p38_goldstein_21_2u	p38_goldstein_21_2u	p38_goldstein_21_2u	p38_goldstein_21_2u	p38_goldstein_22_2v
					p38_goldstein_23_2w_3fly	p38_goldstein_22_2v	p38_goldstein_22_2v	p38_goldstein_22_2v	p38_goldstein_23_2w_3fly
					p38_goldstein_24_2x	p38_goldstein_24_2x	p38_goldstein_23_2w_3fly	p38_goldstein_23_2w_3fly	p38_goldstein_24_2x
					p38_goldstein_25_2y	p38_goldstein_25_2y	p38_goldstein_25_2y	p38_goldstein_24_2x	p38_goldstein_25_2y
					p38_goldstein_26_2z	p38_goldstein_26_2z	p38_goldstein_26_2z	p38_goldstein_26_2z	p38_goldstein_27_2aa
					p38_goldstein_28_2bb	p38_goldstein_27_2aa	p38_goldstein_27_2aa	p38_goldstein_27_2aa	p38_goldstein_28_2bb
					p38_goldstein_29_2cc_3fls	p38_goldstein_29_2cc_3fls	p38_goldstein_28_2bb	p38_goldstein_28_2bb	p38_goldstein_29_2cc_3fls
					p38_goldstein_30_2dd_3flq	p38_goldstein_30_2dd_3flq	p38_goldstein_30_2dd_3flq	p38_goldstein_29_2cc_3fls	p38_goldstein_30_2dd_3flq
					p38_goldstein_31_2ee	p38_goldstein_31_2ee	p38_goldstein_31_2ee	p38_goldstein_31_2ee	p38_goldstein_32_2ff
					p38_goldstein_33_2gg	p38_goldstein_32_2ff	p38_goldstein_32_2ff	p38_goldstein_32_2ff	p38_goldstein_33_2gg
					p38_goldstein_34_2hh_3fmk	p38_goldstein_34_2hh_3fmk	p38_goldstein_33_2gg	p38_goldstein_33_2gg	p38_goldstein_34_2hh_3fmk
					p38_goldstein_35_2ii_3fmh	p38_goldstein_35_2ii_3fmh	p38_goldstein_35_2ii_3fmh	p38_goldstein_34_2hh_3fmk	p38_goldstein_35_2ii_3fmh

## Sheet: BACE
scaffold 1	scaffold 2	scaffold 3		36 Ligands	training set 1	training set 2	training set 3	training set 4	training set 5
bace1_merck_01_1_4dju	bace1_merck_20_13a	bace1_merck_35_17a			bace1_merck_03_4b_2djv	bace1_merck_02_4a	bace1_merck_02_4a	bace1_merck_02_4a	bace1_merck_02_4a
bace1_merck_02_4a	bace1_merck_21_13b	bace1_merck_36_17b			bace1_merck_04_4c	bace1_merck_04_4c	bace1_merck_03_4b_2djv	bace1_merck_03_4b_2djv	bace1_merck_03_4b_2djv
bace1_merck_03_4b_2djv	bace1_merck_22_13c	bace1_merck_37_17c			bace1_merck_05_4d	bace1_merck_05_4d	bace1_merck_05_4d	bace1_merck_04_4c	bace1_merck_04_4c
bace1_merck_04_4c	bace1_merck_23_13d	bace1_merck_38_17d			bace1_merck_10_4i	bace1_merck_10_4i	bace1_merck_10_4i	bace1_merck_10_4i	bace1_merck_05_4d
bace1_merck_05_4d	bace1_merck_24_13e	bace1_merck_39_17e			bace1_merck_12_4k	bace1_merck_11_4j_4djw	bace1_merck_11_4j_4djw	bace1_merck_11_4j_4djw	bace1_merck_11_4j_4djw
bace1_merck_06_4e	bace1_merck_25_13f	bace1_merck_40_17f			bace1_merck_13_4l	bace1_merck_13_4l	bace1_merck_12_4k	bace1_merck_12_4k	bace1_merck_12_4k
bace1_merck_07_4f	bace1_merck_26_13g	bace1_merck_41_17g			bace1_merck_14_4m	bace1_merck_14_4m	bace1_merck_14_4m	bace1_merck_13_4l	bace1_merck_13_4l
bace1_merck_08_4g	bace1_merck_27_13h	bace1_merck_42_17h_4djx			bace1_merck_15_4n	bace1_merck_15_4n	bace1_merck_15_4n	bace1_merck_15_4n	bace1_merck_14_4m
bace1_merck_09_4h	bace1_merck_28_13i	bace1_merck_43_17i			bace1_merck_17_4p	bace1_merck_16_4o	bace1_merck_16_4o	bace1_merck_16_4o	bace1_merck_16_4o
bace1_merck_10_4i	bace1_merck_29_13j	bace1_merck_44_19			bace1_merck_20_13a	bace1_merck_20_13a	bace1_merck_17_4p	bace1_merck_17_4p	bace1_merck_17_4p
bace1_merck_11_4j_4djw	bace1_merck_30_13k	bace1_merck_45_24_4dj7			bace1_merck_21_13b	bace1_merck_21_13b	bace1_merck_21_13b	bace1_merck_20_13a	bace1_merck_20_13a
bace1_merck_12_4k	bace1_merck_31_13l				bace1_merck_22_13c	bace1_merck_22_13c	bace1_merck_22_13c	bace1_merck_22_13c	bace1_merck_21_13b
bace1_merck_13_4l	bace1_merck_32_13m				bace1_merck_24_13e	bace1_merck_23_13d	bace1_merck_23_13d	bace1_merck_23_13d	bace1_merck_23_13d
bace1_merck_14_4m	bace1_merck_33_13n				bace1_merck_25_13f	bace1_merck_25_13f	bace1_merck_24_13e	bace1_merck_24_13e	bace1_merck_24_13e
bace1_merck_15_4n	bace1_merck_34_13o				bace1_merck_26_13g	bace1_merck_26_13g	bace1_merck_26_13g	bace1_merck_25_13f	bace1_merck_25_13f
bace1_merck_16_4o					bace1_merck_27_13h	bace1_merck_27_13h	bace1_merck_27_13h	bace1_merck_27_13h	bace1_merck_26_13g
bace1_merck_17_4p					bace1_merck_29_13j	bace1_merck_28_13i	bace1_merck_28_13i	bace1_merck_28_13i	bace1_merck_28_13i
bace1_merck_18_6b					bace1_merck_30_13k	bace1_merck_30_13k	bace1_merck_29_13j	bace1_merck_29_13j	bace1_merck_29_13j
bace1_merck_19_7b					bace1_merck_32_13m	bace1_merck_32_13m	bace1_merck_32_13m	bace1_merck_30_13k	bace1_merck_30_13k
					bace1_merck_33_13n	bace1_merck_33_13n	bace1_merck_33_13n	bace1_merck_33_13n	bace1_merck_32_13m
					bace1_merck_35_17a	bace1_merck_34_13o	bace1_merck_34_13o	bace1_merck_34_13o	bace1_merck_34_13o
					bace1_merck_36_17b	bace1_merck_35_17a	bace1_merck_36_17b	bace1_merck_35_17a	bace1_merck_35_17a
					bace1_merck_37_17c	bace1_merck_36_17b	bace1_merck_37_17c	bace1_merck_37_17c	bace1_merck_36_17b
					bace1_merck_39_17e	bace1_merck_37_17c	bace1_merck_38_17d	bace1_merck_38_17d	bace1_merck_38_17d
					bace1_merck_40_17f	bace1_merck_38_17d	bace1_merck_39_17e	bace1_merck_39_17e	bace1_merck_39_17e
					bace1_merck_41_17g	bace1_merck_40_17f	bace1_merck_41_17g	bace1_merck_40_17f	bace1_merck_40_17f
					bace1_merck_42_17h_4djx	bace1_merck_41_17g	bace1_merck_42_17h_4djx	bace1_merck_42_17h_4djx	bace1_merck_41_17g
					bace1_merck_45_24_4dj7	bace1_merck_42_17h_4djx	bace1_merck_43_17i	bace1_merck_43_17i	bace1_merck_43_17i
						bace1_merck_43_17i	bace1_merck_45_24_4dj7	bace1_merck_45_24_4dj7	bace1_merck_45_24_4dj7
				45 Ligands	training set 1	training set 2	training set 3	training set 4	training set 5
					bace1_merck_02_4a	bace1_merck_01_1_4dju	bace1_merck_01_1_4dju	bace1_merck_01_1_4dju	bace1_merck_01_1_4dju
					bace1_merck_03_4b_2djv	bace1_merck_03_4b_2djv	bace1_merck_02_4a	bace1_merck_02_4a	bace1_merck_02_4a
					bace1_merck_04_4c	bace1_merck_04_4c	bace1_merck_04_4c	bace1_merck_03_4b_2djv	bace1_merck_03_4b_2djv
					bace1_merck_05_4d	bace1_merck_05_4d	bace1_merck_05_4d	bace1_merck_05_4d	bace1_merck_04_4c
					bace1_merck_07_4f	bace1_merck_06_4e	bace1_merck_06_4e	bace1_merck_06_4e	bace1_merck_06_4e
					bace1_merck_08_4g	bace1_merck_08_4g	bace1_merck_07_4f	bace1_merck_07_4f	bace1_merck_07_4f
					bace1_merck_09_4h	bace1_merck_09_4h	bace1_merck_09_4h	bace1_merck_08_4g	bace1_merck_08_4g
					bace1_merck_10_4i	bace1_merck_10_4i	bace1_merck_10_4i	bace1_merck_10_4i	bace1_merck_09_4h
					bace1_merck_12_4k	bace1_merck_11_4j_4djw	bace1_merck_11_4j_4djw	bace1_merck_11_4j_4djw	bace1_merck_11_4j_4djw
					bace1_merck_13_4l	bace1_merck_13_4l	bace1_merck_12_4k	bace1_merck_12_4k	bace1_merck_12_4k
					bace1_merck_14_4m	bace1_merck_14_4m	bace1_merck_14_4m	bace1_merck_13_4l	bace1_merck_13_4l
					bace1_merck_15_4n	bace1_merck_15_4n	bace1_merck_15_4n	bace1_merck_15_4n	bace1_merck_14_4m
					bace1_merck_17_4p	bace1_merck_16_4o	bace1_merck_16_4o	bace1_merck_16_4o	bace1_merck_16_4o
					bace1_merck_18_6b	bace1_merck_18_6b	bace1_merck_17_4p	bace1_merck_17_4p	bace1_merck_17_4p
					bace1_merck_19_7b	bace1_merck_19_7b	bace1_merck_19_7b	bace1_merck_18_6b	bace1_merck_18_6b
					bace1_merck_21_13b	bace1_merck_20_13a	bace1_merck_20_13a	bace1_merck_20_13a	bace1_merck_19_7b
					bace1_merck_22_13c	bace1_merck_22_13c	bace1_merck_21_13b	bace1_merck_21_13b	bace1_merck_20_13a
					bace1_merck_23_13d	bace1_merck_23_13d	bace1_merck_23_13d	bace1_merck_22_13c	bace1_merck_21_13b
					bace1_merck_24_13e	bace1_merck_24_13e	bace1_merck_24_13e	bace1_merck_24_13e	bace1_merck_22_13c
					bace1_merck_26_13g	bace1_merck_25_13f	bace1_merck_25_13f	bace1_merck_25_13f	bace1_merck_23_13d
					bace1_merck_27_13h	bace1_merck_27_13h	bace1_merck_26_13g	bace1_merck_26_13g	bace1_merck_25_13f
					bace1_merck_28_13i	bace1_merck_28_13i	bace1_merck_28_13i	bace1_merck_27_13h	bace1_merck_26_13g
					bace1_merck_29_13j	bace1_merck_29_13j	bace1_merck_29_13j	bace1_merck_29_13j	bace1_merck_27_13h
					bace1_merck_31_13l	bace1_merck_30_13k	bace1_merck_30_13k	bace1_merck_30_13k	bace1_merck_28_13i
					bace1_merck_32_13m	bace1_merck_32_13m	bace1_merck_31_13l	bace1_merck_31_13l	bace1_merck_30_13k
					bace1_merck_33_13n	bace1_merck_33_13n	bace1_merck_33_13n	bace1_merck_32_13m	bace1_merck_31_13l
					bace1_merck_34_13o	bace1_merck_34_13o	bace1_merck_34_13o	bace1_merck_34_13o	bace1_merck_32_13m
					bace1_merck_35_17a	bace1_merck_35_17a	bace1_merck_35_17a	bace1_merck_35_17a	bace1_merck_33_13n
					bace1_merck_37_17c	bace1_merck_36_17b	bace1_merck_36_17b	bace1_merck_36_17b	bace1_merck_36_17b
					bace1_merck_38_17d	bace1_merck_38_17d	bace1_merck_37_17c	bace1_merck_37_17c	bace1_merck_37_17c
					bace1_merck_39_17e	bace1_merck_39_17e	bace1_merck_39_17e	bace1_merck_38_17d	bace1_merck_38_17d
					bace1_merck_40_17f	bace1_merck_40_17f	bace1_merck_40_17f	bace1_merck_40_17f	bace1_merck_39_17e
					bace1_merck_42_17h_4djx	bace1_merck_41_17g	bace1_merck_41_17g	bace1_merck_41_17g	bace1_merck_41_17g
					bace1_merck_43_17i	bace1_merck_43_17i	bace1_merck_42_17h_4djx	bace1_merck_42_17h_4djx	bace1_merck_42_17h_4djx
					bace1_merck_44_19	bace1_merck_44_19	bace1_merck_44_19	bace1_merck_43_17i	bace1_merck_43_17i
					bace1_merck_45_24_4dj7	bace1_merck_45_24_4dj7	bace1_merck_45_24_4dj7	bace1_merck_45_24_4dj7	bace1_merck_44_19

## Sheet: MCL1
scaffold 1	scaffold 2	scaffold 3	scaffold 4	scaffold 5		42 Ligands	training set 1	training set 2	training set 3	training set 4	training set 5
mcl1_friberg_01	mcl1_friberg_16	mcl1_friberg_21	mcl1_friberg_27	mcl1_friberg_69			mcl1_friberg_26	mcl1_friberg_23	mcl1_friberg_23	mcl1_friberg_23	mcl1_friberg_23
mcl1_friberg_02	mcl1_friberg_17	mcl1_friberg_22	mcl1_friberg_28	mcl1_friberg_70			mcl1_friberg_28	mcl1_friberg_27	mcl1_friberg_26	mcl1_friberg_26	mcl1_friberg_26
mcl1_friberg_03	mcl1_friberg_18	mcl1_friberg_23	mcl1_friberg_29	mcl1_friberg_71			mcl1_friberg_29	mcl1_friberg_29	mcl1_friberg_27	mcl1_friberg_27	mcl1_friberg_27
mcl1_friberg_04		mcl1_friberg_24	mcl1_friberg_30	mcl1_friberg_72			mcl1_friberg_30	mcl1_friberg_30	mcl1_friberg_28	mcl1_friberg_28	mcl1_friberg_28
mcl1_friberg_05		mcl1_friberg_25	mcl1_friberg_31				mcl1_friberg_31	mcl1_friberg_31	mcl1_friberg_30	mcl1_friberg_29	mcl1_friberg_29
mcl1_friberg_06		mcl1_friberg_26	mcl1_friberg_32				mcl1_friberg_33	mcl1_friberg_32	mcl1_friberg_31	mcl1_friberg_31	mcl1_friberg_30
mcl1_friberg_07			mcl1_friberg_33				mcl1_friberg_34	mcl1_friberg_34	mcl1_friberg_32	mcl1_friberg_32	mcl1_friberg_32
mcl1_friberg_08			mcl1_friberg_34				mcl1_friberg_35	mcl1_friberg_35	mcl1_friberg_33	mcl1_friberg_33	mcl1_friberg_33
mcl1_friberg_09			mcl1_friberg_35				mcl1_friberg_36	mcl1_friberg_36	mcl1_friberg_35	mcl1_friberg_34	mcl1_friberg_34
mcl1_friberg_10			mcl1_friberg_36				mcl1_friberg_38	mcl1_friberg_37	mcl1_friberg_36	mcl1_friberg_36	mcl1_friberg_35
mcl1_friberg_11			mcl1_friberg_37				mcl1_friberg_39	mcl1_friberg_39	mcl1_friberg_37	mcl1_friberg_37	mcl1_friberg_37
mcl1_friberg_12			mcl1_friberg_38				mcl1_friberg_40	mcl1_friberg_40	mcl1_friberg_38	mcl1_friberg_38	mcl1_friberg_38
mcl1_friberg_13			mcl1_friberg_39				mcl1_friberg_41	mcl1_friberg_41	mcl1_friberg_40	mcl1_friberg_39	mcl1_friberg_39
mcl1_friberg_14			mcl1_friberg_40				mcl1_friberg_43	mcl1_friberg_42	mcl1_friberg_41	mcl1_friberg_41	mcl1_friberg_40
mcl1_friberg_15			mcl1_friberg_41				mcl1_friberg_44	mcl1_friberg_44	mcl1_friberg_42	mcl1_friberg_42	mcl1_friberg_42
mcl1_friberg_19			mcl1_friberg_42				mcl1_friberg_45	mcl1_friberg_45	mcl1_friberg_43	mcl1_friberg_43	mcl1_friberg_43
mcl1_friberg_20			mcl1_friberg_43				mcl1_friberg_46	mcl1_friberg_46	mcl1_friberg_45	mcl1_friberg_44	mcl1_friberg_44
			mcl1_friberg_44				mcl1_friberg_48	mcl1_friberg_47	mcl1_friberg_46	mcl1_friberg_46	mcl1_friberg_45
			mcl1_friberg_45				mcl1_friberg_49	mcl1_friberg_49	mcl1_friberg_47	mcl1_friberg_47	mcl1_friberg_47
			mcl1_friberg_46				mcl1_friberg_50	mcl1_friberg_50	mcl1_friberg_48	mcl1_friberg_48	mcl1_friberg_48
			mcl1_friberg_47				mcl1_friberg_51	mcl1_friberg_51	mcl1_friberg_50	mcl1_friberg_49	mcl1_friberg_49
			mcl1_friberg_48				mcl1_friberg_53_4hw2	mcl1_friberg_52	mcl1_friberg_51	mcl1_friberg_51	mcl1_friberg_50
			mcl1_friberg_49				mcl1_friberg_54	mcl1_friberg_54	mcl1_friberg_52	mcl1_friberg_52	mcl1_friberg_52
			mcl1_friberg_50				mcl1_friberg_56	mcl1_friberg_56	mcl1_friberg_53_4hw2	mcl1_friberg_53_4hw2	mcl1_friberg_53_4hw2
			mcl1_friberg_51				mcl1_friberg_57	mcl1_friberg_57	mcl1_friberg_56	mcl1_friberg_54	mcl1_friberg_54
			mcl1_friberg_52				mcl1_friberg_60_4hw3	mcl1_friberg_58	mcl1_friberg_57	mcl1_friberg_57	mcl1_friberg_56
			mcl1_friberg_53_4hw2				mcl1_friberg_61	mcl1_friberg_61	mcl1_friberg_58	mcl1_friberg_58	mcl1_friberg_58
			mcl1_friberg_54				mcl1_friberg_62	mcl1_friberg_62	mcl1_friberg_60_4hw3	mcl1_friberg_60_4hw3	mcl1_friberg_60_4hw3
			mcl1_friberg_55				mcl1_friberg_63	mcl1_friberg_63	mcl1_friberg_62	mcl1_friberg_61	mcl1_friberg_61
			mcl1_friberg_56				mcl1_friberg_65	mcl1_friberg_64	mcl1_friberg_63	mcl1_friberg_63	mcl1_friberg_62
			mcl1_friberg_57				mcl1_friberg_66	mcl1_friberg_66	mcl1_friberg_64	mcl1_friberg_64	mcl1_friberg_64
			mcl1_friberg_58				mcl1_friberg_67	mcl1_friberg_67	mcl1_friberg_65	mcl1_friberg_65	mcl1_friberg_65
			mcl1_friberg_59				mcl1_friberg_68	mcl1_friberg_68	mcl1_friberg_67	mcl1_friberg_66	mcl1_friberg_66
			mcl1_friberg_60_4hw3						mcl1_friberg_68	mcl1_friberg_68	mcl1_friberg_67
			mcl1_friberg_61
			mcl1_friberg_62
			mcl1_friberg_63			72 Ligands	training set 1	training set 2	training set 3	training set 4	training set 5
			mcl1_friberg_64				mcl1_friberg_02	mcl1_friberg_01	mcl1_friberg_01	mcl1_friberg_01	mcl1_friberg_01
			mcl1_friberg_65				mcl1_friberg_03	mcl1_friberg_03	mcl1_friberg_02	mcl1_friberg_02	mcl1_friberg_02
			mcl1_friberg_66				mcl1_friberg_04	mcl1_friberg_04	mcl1_friberg_04	mcl1_friberg_03	mcl1_friberg_03
			mcl1_friberg_67				mcl1_friberg_05	mcl1_friberg_05	mcl1_friberg_05	mcl1_friberg_05	mcl1_friberg_04
			mcl1_friberg_68				mcl1_friberg_07	mcl1_friberg_06	mcl1_friberg_06	mcl1_friberg_06	mcl1_friberg_06
							mcl1_friberg_08	mcl1_friberg_08	mcl1_friberg_07	mcl1_friberg_07	mcl1_friberg_07
							mcl1_friberg_09	mcl1_friberg_09	mcl1_friberg_09	mcl1_friberg_08	mcl1_friberg_08
							mcl1_friberg_10	mcl1_friberg_10	mcl1_friberg_10	mcl1_friberg_10	mcl1_friberg_09
							mcl1_friberg_12	mcl1_friberg_11	mcl1_friberg_11	mcl1_friberg_11	mcl1_friberg_11
							mcl1_friberg_13	mcl1_friberg_13	mcl1_friberg_12	mcl1_friberg_12	mcl1_friberg_12
							mcl1_friberg_14	mcl1_friberg_14	mcl1_friberg_14	mcl1_friberg_13	mcl1_friberg_13
							mcl1_friberg_15	mcl1_friberg_15	mcl1_friberg_15	mcl1_friberg_15	mcl1_friberg_14
							mcl1_friberg_17	mcl1_friberg_16	mcl1_friberg_16	mcl1_friberg_16	mcl1_friberg_16
							mcl1_friberg_18	mcl1_friberg_18	mcl1_friberg_17	mcl1_friberg_17	mcl1_friberg_17
							mcl1_friberg_20	mcl1_friberg_19	mcl1_friberg_19	mcl1_friberg_18	mcl1_friberg_18
							mcl1_friberg_21	mcl1_friberg_21	mcl1_friberg_20	mcl1_friberg_19	mcl1_friberg_19
							mcl1_friberg_23	mcl1_friberg_22	mcl1_friberg_21	mcl1_friberg_20	mcl1_friberg_20
							mcl1_friberg_24	mcl1_friberg_24	mcl1_friberg_22	mcl1_friberg_21	mcl1_friberg_22
							mcl1_friberg_25	mcl1_friberg_25	mcl1_friberg_23	mcl1_friberg_22	mcl1_friberg_23
							mcl1_friberg_26	mcl1_friberg_26	mcl1_friberg_25	mcl1_friberg_23	mcl1_friberg_24
							mcl1_friberg_27	mcl1_friberg_27	mcl1_friberg_26	mcl1_friberg_24	mcl1_friberg_25
							mcl1_friberg_28	mcl1_friberg_28	mcl1_friberg_28	mcl1_friberg_26	mcl1_friberg_27
							mcl1_friberg_29	mcl1_friberg_29	mcl1_friberg_29	mcl1_friberg_27	mcl1_friberg_28
							mcl1_friberg_31	mcl1_friberg_30	mcl1_friberg_30	mcl1_friberg_29	mcl1_friberg_30
							mcl1_friberg_32	mcl1_friberg_32	mcl1_friberg_31	mcl1_friberg_30	mcl1_friberg_31
							mcl1_friberg_33	mcl1_friberg_33	mcl1_friberg_33	mcl1_friberg_31	mcl1_friberg_32
							mcl1_friberg_34	mcl1_friberg_34	mcl1_friberg_34	mcl1_friberg_32	mcl1_friberg_33
							mcl1_friberg_36	mcl1_friberg_35	mcl1_friberg_35	mcl1_friberg_34	mcl1_friberg_35
							mcl1_friberg_37	mcl1_friberg_37	mcl1_friberg_36	mcl1_friberg_35	mcl1_friberg_36
							mcl1_friberg_38	mcl1_friberg_38	mcl1_friberg_38	mcl1_friberg_36	mcl1_friberg_37
							mcl1_friberg_39	mcl1_friberg_39	mcl1_friberg_39	mcl1_friberg_37	mcl1_friberg_38
							mcl1_friberg_41	mcl1_friberg_40	mcl1_friberg_40	mcl1_friberg_39	mcl1_friberg_40
							mcl1_friberg_42	mcl1_friberg_42	mcl1_friberg_41	mcl1_friberg_40	mcl1_friberg_41
							mcl1_friberg_43	mcl1_friberg_43	mcl1_friberg_43	mcl1_friberg_41	mcl1_friberg_42
							mcl1_friberg_44	mcl1_friberg_44	mcl1_friberg_44	mcl1_friberg_42	mcl1_friberg_43
							mcl1_friberg_46	mcl1_friberg_45	mcl1_friberg_45	mcl1_friberg_44	mcl1_friberg_45
							mcl1_friberg_47	mcl1_friberg_47	mcl1_friberg_46	mcl1_friberg_45	mcl1_friberg_46
							mcl1_friberg_48	mcl1_friberg_48	mcl1_friberg_48	mcl1_friberg_46	mcl1_friberg_47
							mcl1_friberg_49	mcl1_friberg_49	mcl1_friberg_49	mcl1_friberg_47	mcl1_friberg_48
							mcl1_friberg_51	mcl1_friberg_50	mcl1_friberg_50	mcl1_friberg_49	mcl1_friberg_50
							mcl1_friberg_52	mcl1_friberg_52	mcl1_friberg_51	mcl1_friberg_50	mcl1_friberg_51
							mcl1_friberg_53_4hw2	mcl1_friberg_53_4hw2	mcl1_friberg_53_4hw2	mcl1_friberg_51	mcl1_friberg_52
							mcl1_friberg_54	mcl1_friberg_54	mcl1_friberg_54	mcl1_friberg_52	mcl1_friberg_53_4hw2
							mcl1_friberg_56	mcl1_friberg_55	mcl1_friberg_55	mcl1_friberg_54	mcl1_friberg_55
							mcl1_friberg_57	mcl1_friberg_57	mcl1_friberg_56	mcl1_friberg_55	mcl1_friberg_56
							mcl1_friberg_58	mcl1_friberg_58	mcl1_friberg_58	mcl1_friberg_56	mcl1_friberg_57
							mcl1_friberg_59	mcl1_friberg_59	mcl1_friberg_59	mcl1_friberg_57	mcl1_friberg_58
							mcl1_friberg_61	mcl1_friberg_60_4hw3	mcl1_friberg_60_4hw3	mcl1_friberg_59	mcl1_friberg_60_4hw3
							mcl1_friberg_62	mcl1_friberg_62	mcl1_friberg_61	mcl1_friberg_60_4hw3	mcl1_friberg_61
							mcl1_friberg_63	mcl1_friberg_63	mcl1_friberg_63	mcl1_friberg_61	mcl1_friberg_62
							mcl1_friberg_64	mcl1_friberg_64	mcl1_friberg_64	mcl1_friberg_62	mcl1_friberg_63
							mcl1_friberg_66	mcl1_friberg_65	mcl1_friberg_65	mcl1_friberg_64	mcl1_friberg_65
							mcl1_friberg_67	mcl1_friberg_67	mcl1_friberg_66	mcl1_friberg_65	mcl1_friberg_66
							mcl1_friberg_68	mcl1_friberg_68	mcl1_friberg_68	mcl1_friberg_66	mcl1_friberg_67
							mcl1_friberg_69	mcl1_friberg_69	mcl1_friberg_69	mcl1_friberg_67	mcl1_friberg_68
							mcl1_friberg_70	mcl1_friberg_70	mcl1_friberg_70	mcl1_friberg_70	mcl1_friberg_69
							mcl1_friberg_72	mcl1_friberg_71	mcl1_friberg_71	mcl1_friberg_71	mcl1_friberg_71
									mcl1_friberg_72	mcl1_friberg_72	mcl1_friberg_72

## Sheet: TYK2
scaffold 1	scaffold 2	scaffold 3	scaffold 4	scaffold 5		16 Ligands	training set 1	training set 2	training set 3	training set 4	training set 5
tyk2_liang_ejmc_01	tyk2_liang_ejmc_21	tyk2_liang_ejmc_29	tyk2_liang_ejmc_42	tyk2_liang_jmc_04			tyk2_liang_ejmc_43	tyk2_liang_ejmc_31	tyk2_liang_ejmc_31	tyk2_liang_ejmc_31	tyk2_liang_ejmc_31
tyk2_liang_ejmc_02	tyk2_liang_ejmc_22	tyk2_liang_ejmc_30	tyk2_liang_ejmc_43	tyk2_liang_jmc_05			tyk2_liang_ejmc_44	tyk2_liang_ejmc_42	tyk2_liang_ejmc_42	tyk2_liang_ejmc_42	tyk2_liang_ejmc_42
tyk2_liang_ejmc_03	tyk2_liang_ejmc_23	tyk2_liang_ejmc_31	tyk2_liang_ejmc_44	tyk2_liang_jmc_06			tyk2_liang_ejmc_45	tyk2_liang_ejmc_44	tyk2_liang_ejmc_43	tyk2_liang_ejmc_43	tyk2_liang_ejmc_43
tyk2_liang_ejmc_04	tyk2_liang_ejmc_24	tyk2_liang_ejmc_32	tyk2_liang_ejmc_45	tyk2_liang_jmc_07			tyk2_liang_ejmc_46	tyk2_liang_ejmc_45	tyk2_liang_ejmc_45	tyk2_liang_ejmc_44	tyk2_liang_ejmc_44
tyk2_liang_ejmc_05	tyk2_liang_ejmc_25	tyk2_liang_ejmc_33	tyk2_liang_ejmc_46	tyk2_liang_jmc_08			tyk2_liang_ejmc_48	tyk2_liang_ejmc_46	tyk2_liang_ejmc_46	tyk2_liang_ejmc_46	tyk2_liang_ejmc_45
tyk2_liang_ejmc_06	tyk2_liang_ejmc_26	tyk2_liang_ejmc_34	tyk2_liang_ejmc_47	tyk2_liang_jmc_09			tyk2_liang_ejmc_49	tyk2_liang_ejmc_47	tyk2_liang_ejmc_47	tyk2_liang_ejmc_47	tyk2_liang_ejmc_47
tyk2_liang_ejmc_07	tyk2_liang_ejmc_27	tyk2_liang_ejmc_35	tyk2_liang_ejmc_48	tyk2_liang_jmc_10_r			tyk2_liang_ejmc_50	tyk2_liang_ejmc_49	tyk2_liang_ejmc_48	tyk2_liang_ejmc_48	tyk2_liang_ejmc_48
tyk2_liang_ejmc_08	tyk2_liang_ejmc_28	tyk2_liang_ejmc_36	tyk2_liang_ejmc_49	tyk2_liang_jmc_11			tyk2_liang_ejmc_54	tyk2_liang_ejmc_50	tyk2_liang_ejmc_50	tyk2_liang_ejmc_49	tyk2_liang_ejmc_49
tyk2_liang_ejmc_09		tyk2_liang_ejmc_37	tyk2_liang_ejmc_50	tyk2_liang_jmc_12			tyk2_liang_jmc_23_4gj2	tyk2_liang_ejmc_54	tyk2_liang_ejmc_54	tyk2_liang_ejmc_54	tyk2_liang_ejmc_50
tyk2_liang_ejmc_10		tyk2_liang_ejmc_38	tyk2_liang_ejmc_51	tyk2_liang_jmc_13			tyk2_liang_jmc_27	tyk2_liang_ejmc_55	tyk2_liang_ejmc_55	tyk2_liang_ejmc_55	tyk2_liang_ejmc_55
tyk2_liang_ejmc_11		tyk2_liang_ejmc_39	tyk2_liang_ejmc_52	tyk2_liang_jmc_14			tyk2_liang_jmc_28	tyk2_liang_jmc_27	tyk2_liang_jmc_23_4gj2	tyk2_liang_jmc_23_4gj2	tyk2_liang_jmc_23_4gj2
tyk2_liang_ejmc_12		tyk2_liang_ejmc_40	tyk2_liang_ejmc_53	tyk2_liang_jmc_15			tyk2_liang_jmc_30	tyk2_liang_jmc_28	tyk2_liang_jmc_28	tyk2_liang_jmc_27	tyk2_liang_jmc_27
tyk2_liang_ejmc_13		tyk2_liang_ejmc_41_4gfo	tyk2_liang_ejmc_54	tyk2_liang_jmc_16				tyk2_liang_jmc_30	tyk2_liang_jmc_30	tyk2_liang_jmc_30	tyk2_liang_jmc_28
tyk2_liang_ejmc_14			tyk2_liang_ejmc_55	tyk2_liang_jmc_17
tyk2_liang_ejmc_15				tyk2_liang_jmc_18
tyk2_liang_ejmc_16				tyk2_liang_jmc_19_4gii		91 Ligands	training set 1	training set 2	training set 3	training set 4	training set 5
tyk2_liang_ejmc_17				tyk2_liang_jmc_20			tyk2_liang_ejmc_01	tyk2_liang_ejmc_01	tyk2_liang_ejmc_01	tyk2_liang_ejmc_01	tyk2_liang_ejmc_02
tyk2_liang_ejmc_18				tyk2_liang_jmc_21			tyk2_liang_ejmc_03	tyk2_liang_ejmc_02	tyk2_liang_ejmc_02	tyk2_liang_ejmc_02	tyk2_liang_ejmc_03
tyk2_liang_ejmc_19				tyk2_liang_jmc_22			tyk2_liang_ejmc_04	tyk2_liang_ejmc_04	tyk2_liang_ejmc_03	tyk2_liang_ejmc_03	tyk2_liang_ejmc_04
tyk2_liang_ejmc_20				tyk2_liang_jmc_23_4gj2			tyk2_liang_ejmc_05	tyk2_liang_ejmc_05	tyk2_liang_ejmc_05	tyk2_liang_ejmc_04	tyk2_liang_ejmc_05
				tyk2_liang_jmc_24			tyk2_liang_ejmc_06	tyk2_liang_ejmc_06	tyk2_liang_ejmc_06	tyk2_liang_ejmc_06	tyk2_liang_ejmc_07
				tyk2_liang_jmc_25			tyk2_liang_ejmc_08	tyk2_liang_ejmc_07	tyk2_liang_ejmc_07	tyk2_liang_ejmc_07	tyk2_liang_ejmc_08
				tyk2_liang_jmc_26			tyk2_liang_ejmc_09	tyk2_liang_ejmc_09	tyk2_liang_ejmc_08	tyk2_liang_ejmc_08	tyk2_liang_ejmc_09
				tyk2_liang_jmc_27			tyk2_liang_ejmc_10	tyk2_liang_ejmc_10	tyk2_liang_ejmc_10	tyk2_liang_ejmc_09	tyk2_liang_ejmc_10
				tyk2_liang_jmc_28			tyk2_liang_ejmc_11	tyk2_liang_ejmc_11	tyk2_liang_ejmc_11	tyk2_liang_ejmc_11	tyk2_liang_ejmc_12
				tyk2_liang_jmc_29			tyk2_liang_ejmc_13	tyk2_liang_ejmc_12	tyk2_liang_ejmc_12	tyk2_liang_ejmc_12	tyk2_liang_ejmc_13
				tyk2_liang_jmc_30			tyk2_liang_ejmc_14	tyk2_liang_ejmc_14	tyk2_liang_ejmc_13	tyk2_liang_ejmc_13	tyk2_liang_ejmc_14
				tyk2_liang_jmc_31			tyk2_liang_ejmc_15	tyk2_liang_ejmc_15	tyk2_liang_ejmc_15	tyk2_liang_ejmc_14	tyk2_liang_ejmc_15
				tyk2_liang_jmc_32			tyk2_liang_ejmc_16	tyk2_liang_ejmc_16	tyk2_liang_ejmc_16	tyk2_liang_ejmc_16	tyk2_liang_ejmc_17
				tyk2_liang_jmc_33			tyk2_liang_ejmc_18	tyk2_liang_ejmc_17	tyk2_liang_ejmc_17	tyk2_liang_ejmc_17	tyk2_liang_ejmc_18
				tyk2_liang_jmc_34			tyk2_liang_ejmc_19	tyk2_liang_ejmc_19	tyk2_liang_ejmc_18	tyk2_liang_ejmc_18	tyk2_liang_ejmc_19
				tyk2_liang_jmc_35_4gj3			tyk2_liang_ejmc_20	tyk2_liang_ejmc_20	tyk2_liang_ejmc_20	tyk2_liang_ejmc_19	tyk2_liang_ejmc_20
				tyk2_liang_jmc_36			tyk2_liang_ejmc_21	tyk2_liang_ejmc_21	tyk2_liang_ejmc_21	tyk2_liang_ejmc_22	tyk2_liang_ejmc_21
				tyk2_liang_jmc_37			tyk2_liang_ejmc_22	tyk2_liang_ejmc_22	tyk2_liang_ejmc_22	tyk2_liang_ejmc_23	tyk2_liang_ejmc_23
							tyk2_liang_ejmc_24	tyk2_liang_ejmc_23	tyk2_liang_ejmc_23	tyk2_liang_ejmc_24	tyk2_liang_ejmc_24
							tyk2_liang_ejmc_25	tyk2_liang_ejmc_25	tyk2_liang_ejmc_24	tyk2_liang_ejmc_25	tyk2_liang_ejmc_25
							tyk2_liang_ejmc_26	tyk2_liang_ejmc_26	tyk2_liang_ejmc_26	tyk2_liang_ejmc_27	tyk2_liang_ejmc_26
							tyk2_liang_ejmc_27	tyk2_liang_ejmc_27	tyk2_liang_ejmc_27	tyk2_liang_ejmc_28	tyk2_liang_ejmc_28
							tyk2_liang_ejmc_29	tyk2_liang_ejmc_28	tyk2_liang_ejmc_28	tyk2_liang_ejmc_29	tyk2_liang_ejmc_29
							tyk2_liang_ejmc_30	tyk2_liang_ejmc_30	tyk2_liang_ejmc_29	tyk2_liang_ejmc_30	tyk2_liang_ejmc_30
							tyk2_liang_ejmc_31	tyk2_liang_ejmc_31	tyk2_liang_ejmc_31	tyk2_liang_ejmc_32	tyk2_liang_ejmc_31
							tyk2_liang_ejmc_32	tyk2_liang_ejmc_32	tyk2_liang_ejmc_32	tyk2_liang_ejmc_33	tyk2_liang_ejmc_33
							tyk2_liang_ejmc_34	tyk2_liang_ejmc_33	tyk2_liang_ejmc_33	tyk2_liang_ejmc_34	tyk2_liang_ejmc_34
							tyk2_liang_ejmc_35	tyk2_liang_ejmc_35	tyk2_liang_ejmc_34	tyk2_liang_ejmc_35	tyk2_liang_ejmc_35
							tyk2_liang_ejmc_36	tyk2_liang_ejmc_36	tyk2_liang_ejmc_36	tyk2_liang_ejmc_37	tyk2_liang_ejmc_36
							tyk2_liang_ejmc_37	tyk2_liang_ejmc_37	tyk2_liang_ejmc_37	tyk2_liang_ejmc_38	tyk2_liang_ejmc_38
							tyk2_liang_ejmc_39	tyk2_liang_ejmc_38	tyk2_liang_ejmc_38	tyk2_liang_ejmc_39	tyk2_liang_ejmc_39
							tyk2_liang_ejmc_40	tyk2_liang_ejmc_40	tyk2_liang_ejmc_39	tyk2_liang_ejmc_40	tyk2_liang_ejmc_40
							tyk2_liang_ejmc_41_4gfo	tyk2_liang_ejmc_41_4gfo	tyk2_liang_ejmc_41_4gfo	tyk2_liang_ejmc_42	tyk2_liang_ejmc_41_4gfo
							tyk2_liang_ejmc_43	tyk2_liang_ejmc_42	tyk2_liang_ejmc_42	tyk2_liang_ejmc_43	tyk2_liang_ejmc_42
							tyk2_liang_ejmc_44	tyk2_liang_ejmc_44	tyk2_liang_ejmc_43	tyk2_liang_ejmc_44	tyk2_liang_ejmc_43
							tyk2_liang_ejmc_45	tyk2_liang_ejmc_45	tyk2_liang_ejmc_45	tyk2_liang_ejmc_46	tyk2_liang_ejmc_44
							tyk2_liang_ejmc_46	tyk2_liang_ejmc_46	tyk2_liang_ejmc_46	tyk2_liang_ejmc_47	tyk2_liang_ejmc_45
							tyk2_liang_ejmc_48	tyk2_liang_ejmc_47	tyk2_liang_ejmc_47	tyk2_liang_ejmc_48	tyk2_liang_ejmc_47
							tyk2_liang_ejmc_49	tyk2_liang_ejmc_49	tyk2_liang_ejmc_48	tyk2_liang_ejmc_49	tyk2_liang_ejmc_48
							tyk2_liang_ejmc_50	tyk2_liang_ejmc_50	tyk2_liang_ejmc_50	tyk2_liang_ejmc_51	tyk2_liang_ejmc_49
							tyk2_liang_ejmc_51	tyk2_liang_ejmc_51	tyk2_liang_ejmc_51	tyk2_liang_ejmc_52	tyk2_liang_ejmc_50
							tyk2_liang_ejmc_53	tyk2_liang_ejmc_52	tyk2_liang_ejmc_52	tyk2_liang_ejmc_53	tyk2_liang_ejmc_52
							tyk2_liang_ejmc_54	tyk2_liang_ejmc_54	tyk2_liang_ejmc_53	tyk2_liang_ejmc_54	tyk2_liang_ejmc_53
							tyk2_liang_ejmc_55	tyk2_liang_ejmc_55	tyk2_liang_ejmc_55	tyk2_liang_jmc_01_3lxn	tyk2_liang_ejmc_54
							tyk2_liang_jmc_01_3lxn	tyk2_liang_jmc_01_3lxn	tyk2_liang_jmc_01_3lxn	tyk2_liang_jmc_04	tyk2_liang_ejmc_55
							tyk2_liang_jmc_04	tyk2_liang_jmc_04	tyk2_liang_jmc_04	tyk2_liang_jmc_05	tyk2_liang_jmc_05
							tyk2_liang_jmc_06	tyk2_liang_jmc_05	tyk2_liang_jmc_05	tyk2_liang_jmc_06	tyk2_liang_jmc_06
							tyk2_liang_jmc_07	tyk2_liang_jmc_07	tyk2_liang_jmc_06	tyk2_liang_jmc_07	tyk2_liang_jmc_07
							tyk2_liang_jmc_08	tyk2_liang_jmc_08	tyk2_liang_jmc_08	tyk2_liang_jmc_09	tyk2_liang_jmc_08
							tyk2_liang_jmc_09	tyk2_liang_jmc_09	tyk2_liang_jmc_09	tyk2_liang_jmc_10_r	tyk2_liang_jmc_10_r
							tyk2_liang_jmc_11	tyk2_liang_jmc_10_r	tyk2_liang_jmc_10_r	tyk2_liang_jmc_11	tyk2_liang_jmc_11
							tyk2_liang_jmc_12	tyk2_liang_jmc_12	tyk2_liang_jmc_11	tyk2_liang_jmc_12	tyk2_liang_jmc_12
							tyk2_liang_jmc_13	tyk2_liang_jmc_13	tyk2_liang_jmc_13	tyk2_liang_jmc_14	tyk2_liang_jmc_13
							tyk2_liang_jmc_14	tyk2_liang_jmc_14	tyk2_liang_jmc_14	tyk2_liang_jmc_15	tyk2_liang_jmc_15
							tyk2_liang_jmc_16	tyk2_liang_jmc_15	tyk2_liang_jmc_15	tyk2_liang_jmc_16	tyk2_liang_jmc_16
							tyk2_liang_jmc_17	tyk2_liang_jmc_17	tyk2_liang_jmc_16	tyk2_liang_jmc_17	tyk2_liang_jmc_17
							tyk2_liang_jmc_18	tyk2_liang_jmc_18	tyk2_liang_jmc_18	tyk2_liang_jmc_19_4gii	tyk2_liang_jmc_18
							tyk2_liang_jmc_19_4gii	tyk2_liang_jmc_19_4gii	tyk2_liang_jmc_19_4gii	tyk2_liang_jmc_20	tyk2_liang_jmc_20
							tyk2_liang_jmc_21	tyk2_liang_jmc_20	tyk2_liang_jmc_20	tyk2_liang_jmc_21	tyk2_liang_jmc_21
							tyk2_liang_jmc_22	tyk2_liang_jmc_22	tyk2_liang_jmc_21	tyk2_liang_jmc_22	tyk2_liang_jmc_22
							tyk2_liang_jmc_23_4gj2	tyk2_liang_jmc_23_4gj2	tyk2_liang_jmc_23_4gj2	tyk2_liang_jmc_24	tyk2_liang_jmc_23_4gj2
							tyk2_liang_jmc_24	tyk2_liang_jmc_24	tyk2_liang_jmc_24	tyk2_liang_jmc_25	tyk2_liang_jmc_25
							tyk2_liang_jmc_26	tyk2_liang_jmc_25	tyk2_liang_jmc_25	tyk2_liang_jmc_26	tyk2_liang_jmc_26
							tyk2_liang_jmc_27	tyk2_liang_jmc_27	tyk2_liang_jmc_26	tyk2_liang_jmc_27	tyk2_liang_jmc_27
							tyk2_liang_jmc_28	tyk2_liang_jmc_28	tyk2_liang_jmc_28	tyk2_liang_jmc_29	tyk2_liang_jmc_28
							tyk2_liang_jmc_29	tyk2_liang_jmc_29	tyk2_liang_jmc_29	tyk2_liang_jmc_30	tyk2_liang_jmc_30
							tyk2_liang_jmc_31	tyk2_liang_jmc_30	tyk2_liang_jmc_30	tyk2_liang_jmc_31	tyk2_liang_jmc_31
							tyk2_liang_jmc_32	tyk2_liang_jmc_32	tyk2_liang_jmc_31	tyk2_liang_jmc_32	tyk2_liang_jmc_32
							tyk2_liang_jmc_33	tyk2_liang_jmc_33	tyk2_liang_jmc_33	tyk2_liang_jmc_34	tyk2_liang_jmc_33
							tyk2_liang_jmc_34	tyk2_liang_jmc_34	tyk2_liang_jmc_34	tyk2_liang_jmc_35_4gj3	tyk2_liang_jmc_35_4gj3
							tyk2_liang_jmc_36	tyk2_liang_jmc_35_4gj3	tyk2_liang_jmc_35_4gj3	tyk2_liang_jmc_36	tyk2_liang_jmc_36
							tyk2_liang_jmc_37	tyk2_liang_jmc_37	tyk2_liang_jmc_36	tyk2_liang_jmc_37	tyk2_liang_jmc_37

## Sheet: JNK1
scaffold 0	scaffold 1	scaffold 2	scaffold 3	scaffold 4		21 Ligands	training set 1	training set 2	training set 3	training set 4	training set 5
jnk1_abbott_01_AZ1	jnk1_abbott_04_6a	jnk1_abbott_28_28a	jnk1_abbott_37_17	jnk1_abbott_54_39			jnk1_abbott_09_6f	jnk1_abbott_08_6e	jnk1_abbott_08_6e	jnk1_abbott_08_6e	jnk1_abbott_08_6e
jnk1_abbott_02_AZ2	jnk1_abbott_05_6b	jnk1_abbott_29_28b	jnk1_abbott_38_18a	jnk1_abbott_55_46			jnk1_abbott_10_6g	jnk1_abbott_10_6g	jnk1_abbott_09_6f	jnk1_abbott_09_6f	jnk1_abbott_09_6f
jnk1_abbott_03_AZ3	jnk1_abbott_06_6c	jnk1_abbott_30_28c	jnk1_abbott_39_18b	jnk1_abbott_56_43			jnk1_abbott_11_6h	jnk1_abbott_11_6h	jnk1_abbott_11_6h	jnk1_abbott_10_6g	jnk1_abbott_10_6g
	jnk1_abbott_07_6d	jnk1_abbott_31_28d	jnk1_abbott_40_19a	jnk1_abbott_57_41			jnk1_abbott_12_6i	jnk1_abbott_12_6i	jnk1_abbott_12_6i	jnk1_abbott_12_6i	jnk1_abbott_11_6h
	jnk1_abbott_08_6e	jnk1_abbott_32_29	jnk1_abbott_41_19b	jnk1_abbott_58_42			jnk1_abbott_14_6k	jnk1_abbott_13_6j	jnk1_abbott_13_6j	jnk1_abbott_13_6j	jnk1_abbott_13_6j
	jnk1_abbott_09_6f	jnk1_abbott_33_30	jnk1_abbott_42_19c	jnk1_abbott_59_35			jnk1_abbott_15_6l	jnk1_abbott_15_6l	jnk1_abbott_14_6k	jnk1_abbott_14_6k	jnk1_abbott_14_6k
	jnk1_abbott_10_6g	jnk1_abbott_34_31_down	jnk1_abbott_43_19d				jnk1_abbott_16_6m	jnk1_abbott_16_6m	jnk1_abbott_16_6m	jnk1_abbott_15_6l	jnk1_abbott_15_6l
	jnk1_abbott_11_6h	jnk1_abbott_35_33_down	jnk1_abbott_44_19e				jnk1_abbott_17_6n	jnk1_abbott_17_6n	jnk1_abbott_17_6n	jnk1_abbott_17_6n	jnk1_abbott_16_6m
	jnk1_abbott_12_6i	jnk1_abbott_36_34_down	jnk1_abbott_45_20a				jnk1_abbott_19_6p	jnk1_abbott_18_6o	jnk1_abbott_18_6o	jnk1_abbott_18_6o	jnk1_abbott_18_6o
	jnk1_abbott_13_6j		jnk1_abbott_46_20b				jnk1_abbott_20_6q	jnk1_abbott_20_6q	jnk1_abbott_19_6p	jnk1_abbott_19_6p	jnk1_abbott_19_6p
	jnk1_abbott_14_6k		jnk1_abbott_47_20c				jnk1_abbott_21_6r	jnk1_abbott_21_6r	jnk1_abbott_21_6r	jnk1_abbott_20_6q	jnk1_abbott_20_6q
	jnk1_abbott_15_6l		jnk1_abbott_48_21				jnk1_abbott_22_6s	jnk1_abbott_22_6s	jnk1_abbott_22_6s	jnk1_abbott_22_6s	jnk1_abbott_21_6r
	jnk1_abbott_16_6m		jnk1_abbott_49_22				jnk1_abbott_24_6u	jnk1_abbott_23_6t_2gmx	jnk1_abbott_23_6t_2gmx	jnk1_abbott_23_6t_2gmx	jnk1_abbott_23_6t_2gmx
	jnk1_abbott_17_6n		jnk1_abbott_50_23				jnk1_abbott_39_18b	jnk1_abbott_39_18b	jnk1_abbott_24_6u	jnk1_abbott_24_6u	jnk1_abbott_24_6u
	jnk1_abbott_18_6o		jnk1_abbott_51_24				jnk1_abbott_45_20a	jnk1_abbott_45_20a	jnk1_abbott_45_20a	jnk1_abbott_39_18b	jnk1_abbott_39_18b
	jnk1_abbott_19_6p		jnk1_abbott_52_25				jnk1_abbott_46_20b	jnk1_abbott_46_20b	jnk1_abbott_46_20b	jnk1_abbott_46_20b	jnk1_abbott_45_20a
	jnk1_abbott_20_6q		jnk1_abbott_53_26					jnk1_abbott_47_20c	jnk1_abbott_47_20c	jnk1_abbott_47_20c	jnk1_abbott_47_20c
	jnk1_abbott_21_6r
	jnk1_abbott_22_6s
	jnk1_abbott_23_6t_2gmx					59 Ligands	training set 1	training set 2	training set 3	training set 4	training set 5
	jnk1_abbott_24_6u						jnk1_abbott_01_AZ1	jnk1_abbott_02_AZ2	jnk1_abbott_01_AZ1	jnk1_abbott_01_AZ1	jnk1_abbott_01_AZ1
	jnk1_abbott_25_7						jnk1_abbott_02_AZ2	jnk1_abbott_03_AZ3	jnk1_abbott_03_AZ3	jnk1_abbott_02_AZ2	jnk1_abbott_02_AZ2
	jnk1_abbott_26_8						jnk1_abbott_03_AZ3	jnk1_abbott_04_6a	jnk1_abbott_04_6a	jnk1_abbott_04_6a	jnk1_abbott_03_AZ3
	jnk1_abbott_27_10						jnk1_abbott_05_6b	jnk1_abbott_06_6c	jnk1_abbott_05_6b	jnk1_abbott_05_6b	jnk1_abbott_04_6a
							jnk1_abbott_06_6c	jnk1_abbott_07_6d	jnk1_abbott_07_6d	jnk1_abbott_06_6c	jnk1_abbott_05_6b
							jnk1_abbott_07_6d	jnk1_abbott_08_6e	jnk1_abbott_08_6e	jnk1_abbott_08_6e	jnk1_abbott_06_6c
							jnk1_abbott_08_6e	jnk1_abbott_09_6f	jnk1_abbott_09_6f	jnk1_abbott_09_6f	jnk1_abbott_07_6d
							jnk1_abbott_10_6g	jnk1_abbott_11_6h	jnk1_abbott_10_6g	jnk1_abbott_10_6g	jnk1_abbott_09_6f
							jnk1_abbott_11_6h	jnk1_abbott_12_6i	jnk1_abbott_12_6i	jnk1_abbott_11_6h	jnk1_abbott_10_6g
							jnk1_abbott_12_6i	jnk1_abbott_13_6j	jnk1_abbott_13_6j	jnk1_abbott_13_6j	jnk1_abbott_11_6h
							jnk1_abbott_13_6j	jnk1_abbott_14_6k	jnk1_abbott_14_6k	jnk1_abbott_14_6k	jnk1_abbott_12_6i
							jnk1_abbott_15_6l	jnk1_abbott_16_6m	jnk1_abbott_15_6l	jnk1_abbott_15_6l	jnk1_abbott_14_6k
							jnk1_abbott_16_6m	jnk1_abbott_17_6n	jnk1_abbott_17_6n	jnk1_abbott_16_6m	jnk1_abbott_15_6l
							jnk1_abbott_17_6n	jnk1_abbott_18_6o	jnk1_abbott_18_6o	jnk1_abbott_18_6o	jnk1_abbott_16_6m
							jnk1_abbott_18_6o	jnk1_abbott_19_6p	jnk1_abbott_19_6p	jnk1_abbott_19_6p	jnk1_abbott_17_6n
							jnk1_abbott_20_6q	jnk1_abbott_21_6r	jnk1_abbott_20_6q	jnk1_abbott_20_6q	jnk1_abbott_19_6p
							jnk1_abbott_21_6r	jnk1_abbott_22_6s	jnk1_abbott_22_6s	jnk1_abbott_21_6r	jnk1_abbott_20_6q
							jnk1_abbott_22_6s	jnk1_abbott_23_6t_2gmx	jnk1_abbott_23_6t_2gmx	jnk1_abbott_23_6t_2gmx	jnk1_abbott_21_6r
							jnk1_abbott_23_6t_2gmx	jnk1_abbott_24_6u	jnk1_abbott_24_6u	jnk1_abbott_24_6u	jnk1_abbott_22_6s
							jnk1_abbott_25_7	jnk1_abbott_26_8	jnk1_abbott_25_7	jnk1_abbott_25_7	jnk1_abbott_24_6u
							jnk1_abbott_26_8	jnk1_abbott_27_10	jnk1_abbott_27_10	jnk1_abbott_26_8	jnk1_abbott_25_7
							jnk1_abbott_27_10	jnk1_abbott_28_28a	jnk1_abbott_29_28b	jnk1_abbott_28_28a	jnk1_abbott_26_8
							jnk1_abbott_28_28a	jnk1_abbott_29_28b	jnk1_abbott_30_28c	jnk1_abbott_30_28c	jnk1_abbott_27_10
							jnk1_abbott_29_28b	jnk1_abbott_30_28c	jnk1_abbott_31_28d	jnk1_abbott_31_28d	jnk1_abbott_28_28a
							jnk1_abbott_30_28c	jnk1_abbott_31_28d	jnk1_abbott_32_29	jnk1_abbott_32_29	jnk1_abbott_29_28b
							jnk1_abbott_32_29	jnk1_abbott_33_30	jnk1_abbott_34_31_down	jnk1_abbott_33_30	jnk1_abbott_31_28d
							jnk1_abbott_33_30	jnk1_abbott_34_31_down	jnk1_abbott_35_33_down	jnk1_abbott_35_33_down	jnk1_abbott_32_29
							jnk1_abbott_34_31_down	jnk1_abbott_35_33_down	jnk1_abbott_36_34_down	jnk1_abbott_36_34_down	jnk1_abbott_33_30
							jnk1_abbott_35_33_down	jnk1_abbott_36_34_down	jnk1_abbott_37_17	jnk1_abbott_37_17	jnk1_abbott_34_31_down
							jnk1_abbott_38_18a	jnk1_abbott_37_17	jnk1_abbott_38_18a	jnk1_abbott_38_18a	jnk1_abbott_36_34_down
							jnk1_abbott_39_18b	jnk1_abbott_39_18b	jnk1_abbott_40_19a	jnk1_abbott_39_18b	jnk1_abbott_37_17
							jnk1_abbott_40_19a	jnk1_abbott_40_19a	jnk1_abbott_41_19b	jnk1_abbott_41_19b	jnk1_abbott_38_18a
							jnk1_abbott_41_19b	jnk1_abbott_41_19b	jnk1_abbott_42_19c	jnk1_abbott_42_19c	jnk1_abbott_39_18b
							jnk1_abbott_43_19d	jnk1_abbott_42_19c	jnk1_abbott_43_19d	jnk1_abbott_43_19d	jnk1_abbott_40_19a
							jnk1_abbott_44_19e	jnk1_abbott_44_19e	jnk1_abbott_45_20a	jnk1_abbott_44_19e	jnk1_abbott_42_19c
							jnk1_abbott_45_20a	jnk1_abbott_45_20a	jnk1_abbott_46_20b	jnk1_abbott_46_20b	jnk1_abbott_43_19d
							jnk1_abbott_46_20b	jnk1_abbott_46_20b	jnk1_abbott_47_20c	jnk1_abbott_47_20c	jnk1_abbott_44_19e
							jnk1_abbott_48_21	jnk1_abbott_47_20c	jnk1_abbott_48_21	jnk1_abbott_48_21	jnk1_abbott_45_20a
							jnk1_abbott_49_22	jnk1_abbott_49_22	jnk1_abbott_50_23	jnk1_abbott_49_22	jnk1_abbott_47_20c
							jnk1_abbott_50_23	jnk1_abbott_50_23	jnk1_abbott_51_24	jnk1_abbott_51_24	jnk1_abbott_48_21
							jnk1_abbott_51_24	jnk1_abbott_51_24	jnk1_abbott_52_25	jnk1_abbott_52_25	jnk1_abbott_49_22
							jnk1_abbott_53_26	jnk1_abbott_52_25	jnk1_abbott_53_26	jnk1_abbott_53_26	jnk1_abbott_50_23
							jnk1_abbott_54_39	jnk1_abbott_54_39	jnk1_abbott_54_39	jnk1_abbott_54_39	jnk1_abbott_52_25
							jnk1_abbott_56_43	jnk1_abbott_55_46	jnk1_abbott_55_46	jnk1_abbott_55_46	jnk1_abbott_53_26
							jnk1_abbott_57_41	jnk1_abbott_57_41	jnk1_abbott_56_43	jnk1_abbott_56_43	jnk1_abbott_55_46
							jnk1_abbott_58_42	jnk1_abbott_58_42	jnk1_abbott_58_42	jnk1_abbott_57_41	jnk1_abbott_56_43
							jnk1_abbott_59_35	jnk1_abbott_59_35	jnk1_abbott_59_35	jnk1_abbott_59_35	jnk1_abbott_57_41
											jnk1_abbott_58_42

## Sheet: Thrombin
scaffold 1	scaffold 2	scaffold 3	scaffold 4	scaffold 5	scaffold 6	scaffold 7		11 Ligands	training set 1	training set 2	training set 3	training set 4	training set 5
thrombin_baum_01_1a_1zdv	thrombin_baum_05_2a	thrombin_baum_10_3a_2zf0	thrombin_baum_14_4_2zda	thrombin_baum_15_5_2zff	thrombin_baum_16_6a	thrombin_baum_21_7a			thrombin_baum_02_1b_2zc9	thrombin_baum_01_1a_1zdv	thrombin_baum_01_1a_1zdv	thrombin_baum_01_1a_1zdv	thrombin_baum_01_1a_1zdv
thrombin_baum_02_1b_2zc9	thrombin_baum_06_2b	thrombin_baum_11_3b			thrombin_baum_17_6b	thrombin_baum_22_7b			thrombin_baum_03_1c	thrombin_baum_03_1c	thrombin_baum_02_1b_2zc9	thrombin_baum_02_1b_2zc9	thrombin_baum_02_1b_2zc9
thrombin_baum_03_1c	thrombin_baum_07_2c	thrombin_baum_12_3c			thrombin_baum_18_6c	thrombin_baum_23_7c			thrombin_baum_04_1d	thrombin_baum_04_1d	thrombin_baum_04_1d	thrombin_baum_03_1c	thrombin_baum_03_1c
thrombin_baum_04_1d	thrombin_baum_08_2d	thrombin_baum_13_3d			thrombin_baum_19_6d	thrombin_baum_24_7d_r			thrombin_baum_10_3a_2zf0	thrombin_baum_10_3a_2zf0	thrombin_baum_10_3a_2zf0	thrombin_baum_10_3a_2zf0	thrombin_baum_04_1d
	thrombin_baum_09_2e				thrombin_baum_20_6e	thrombin_baum_25_7e			thrombin_baum_15_5_2zff	thrombin_baum_11_3b	thrombin_baum_11_3b	thrombin_baum_11_3b	thrombin_baum_11_3b
						thrombin_baum_26_7f			thrombin_baum_16_6a	thrombin_baum_16_6a	thrombin_baum_15_5_2zff	thrombin_baum_15_5_2zff	thrombin_baum_15_5_2zff
									thrombin_baum_17_6b	thrombin_baum_17_6b	thrombin_baum_17_6b	thrombin_baum_16_6a	thrombin_baum_16_6a
									thrombin_baum_20_6e	thrombin_baum_20_6e	thrombin_baum_20_6e	thrombin_baum_20_6e	thrombin_baum_17_6b
										thrombin_baum_21_7a	thrombin_baum_21_7a	thrombin_baum_21_7a	thrombin_baum_21_7a
								26 Ligands	training set 1	training set 2	training set 3	training set 4	training set 5
									thrombin_baum_02_1b_2zc9	thrombin_baum_01_1a_1zdv	thrombin_baum_01_1a_1zdv	thrombin_baum_01_1a_1zdv	thrombin_baum_01_1a_1zdv
									thrombin_baum_03_1c	thrombin_baum_03_1c	thrombin_baum_02_1b_2zc9	thrombin_baum_02_1b_2zc9	thrombin_baum_02_1b_2zc9
									thrombin_baum_04_1d	thrombin_baum_04_1d	thrombin_baum_04_1d	thrombin_baum_03_1c	thrombin_baum_03_1c
									thrombin_baum_05_2a	thrombin_baum_05_2a	thrombin_baum_05_2a	thrombin_baum_05_2a	thrombin_baum_04_1d
									thrombin_baum_07_2c	thrombin_baum_06_2b	thrombin_baum_06_2b	thrombin_baum_06_2b	thrombin_baum_06_2b
									thrombin_baum_08_2d	thrombin_baum_08_2d	thrombin_baum_07_2c	thrombin_baum_07_2c	thrombin_baum_07_2c
									thrombin_baum_09_2e	thrombin_baum_09_2e	thrombin_baum_09_2e	thrombin_baum_08_2d	thrombin_baum_08_2d
									thrombin_baum_11_3b	thrombin_baum_10_3a_2zf0	thrombin_baum_10_3a_2zf0	thrombin_baum_10_3a_2zf0	thrombin_baum_09_2e
									thrombin_baum_12_3c	thrombin_baum_12_3c	thrombin_baum_11_3b	thrombin_baum_11_3b	thrombin_baum_10_3a_2zf0
									thrombin_baum_13_3d	thrombin_baum_13_3d	thrombin_baum_13_3d	thrombin_baum_12_3c	thrombin_baum_11_3b
									thrombin_baum_14_4_2zda	thrombin_baum_14_4_2zda	thrombin_baum_14_4_2zda	thrombin_baum_14_4_2zda	thrombin_baum_12_3c
									thrombin_baum_15_5_2zff	thrombin_baum_15_5_2zff	thrombin_baum_15_5_2zff	thrombin_baum_15_5_2zff	thrombin_baum_13_3d
									thrombin_baum_17_6b	thrombin_baum_16_6a	thrombin_baum_16_6a	thrombin_baum_16_6a	thrombin_baum_16_6a
									thrombin_baum_18_6c	thrombin_baum_18_6c	thrombin_baum_17_6b	thrombin_baum_17_6b	thrombin_baum_17_6b
									thrombin_baum_19_6d	thrombin_baum_19_6d	thrombin_baum_19_6d	thrombin_baum_18_6c	thrombin_baum_18_6c
									thrombin_baum_20_6e	thrombin_baum_20_6e	thrombin_baum_20_6e	thrombin_baum_20_6e	thrombin_baum_19_6d
									thrombin_baum_22_7b	thrombin_baum_21_7a	thrombin_baum_21_7a	thrombin_baum_21_7a	thrombin_baum_21_7a
									thrombin_baum_23_7c	thrombin_baum_23_7c	thrombin_baum_22_7b	thrombin_baum_22_7b	thrombin_baum_22_7b
									thrombin_baum_24_7d_r	thrombin_baum_24_7d_r	thrombin_baum_24_7d_r	thrombin_baum_23_7c	thrombin_baum_23_7c
									thrombin_baum_25_7e	thrombin_baum_25_7e	thrombin_baum_25_7e	thrombin_baum_25_7e	thrombin_baum_24_7d_r
										thrombin_baum_26_7f	thrombin_baum_26_7f	thrombin_baum_26_7f	thrombin_baum_26_7f

## Sheet: CDK2
scaffold 1	scaffold 2	scaffold 3	scaffold 4		16 Ligands	training set 1	training set 2	training set 3	training set 4	training set 5
cdk2_hardcastle_01	cdk2_hardcastle_02_1h1q	cdk2_hardcastle_03_1h1s	cdk2_hardcastle_43			cdk2_hardcastle_02_1h1q	cdk2_hardcastle_02_1h1q	cdk2_hardcastle_02_1h1q	cdk2_hardcastle_03_1h1s	cdk2_hardcastle_02_1h1q
cdk2_hardcastle_04	cdk2_hardcastle_15_1h1r	cdk2_hardcastle_28	cdk2_hardcastle_44			cdk2_hardcastle_15_1h1r	cdk2_hardcastle_03_1h1s	cdk2_hardcastle_03_1h1s	cdk2_hardcastle_15_1h1r	cdk2_hardcastle_03_1h1s
cdk2_hardcastle_05	cdk2_hardcastle_16	cdk2_hardcastle_29	cdk2_hardcastle_45			cdk2_hardcastle_20	cdk2_hardcastle_15_1h1r	cdk2_hardcastle_15_1h1r	cdk2_hardcastle_17	cdk2_hardcastle_17
cdk2_hardcastle_06	cdk2_hardcastle_17	cdk2_hardcastle_30	cdk2_hardcastle_46			cdk2_hardcastle_21	cdk2_hardcastle_17	cdk2_hardcastle_17	cdk2_hardcastle_20	cdk2_hardcastle_20
cdk2_hardcastle_07	cdk2_hardcastle_18	cdk2_hardcastle_31				cdk2_hardcastle_22	cdk2_hardcastle_21	cdk2_hardcastle_20	cdk2_hardcastle_21	cdk2_hardcastle_21
cdk2_hardcastle_08	cdk2_hardcastle_19	cdk2_hardcastle_32				cdk2_hardcastle_25_1oi9	cdk2_hardcastle_22	cdk2_hardcastle_22	cdk2_hardcastle_25_1oi9	cdk2_hardcastle_22
cdk2_hardcastle_09	cdk2_hardcastle_20	cdk2_hardcastle_33_1oiu				cdk2_hardcastle_28	cdk2_hardcastle_25_1oi9	cdk2_hardcastle_25_1oi9	cdk2_hardcastle_26	cdk2_hardcastle_26
cdk2_hardcastle_10	cdk2_hardcastle_21	cdk2_hardcastle_34_1oiy				cdk2_hardcastle_29	cdk2_hardcastle_26	cdk2_hardcastle_26	cdk2_hardcastle_28	cdk2_hardcastle_28
cdk2_hardcastle_11	cdk2_hardcastle_22	cdk2_hardcastle_36				cdk2_hardcastle_30	cdk2_hardcastle_29	cdk2_hardcastle_28	cdk2_hardcastle_29	cdk2_hardcastle_29
cdk2_hardcastle_12	cdk2_hardcastle_23	cdk2_hardcastle_37				cdk2_hardcastle_31	cdk2_hardcastle_30	cdk2_hardcastle_30	cdk2_hardcastle_31	cdk2_hardcastle_30
cdk2_hardcastle_13	cdk2_hardcastle_24	cdk2_hardcastle_38				cdk2_hardcastle_33_1oiu	cdk2_hardcastle_31	cdk2_hardcastle_31	cdk2_hardcastle_32	cdk2_hardcastle_32
cdk2_hardcastle_14	cdk2_hardcastle_25_1oi9	cdk2_hardcastle_39				cdk2_hardcastle_34_1oiy	cdk2_hardcastle_32	cdk2_hardcastle_32	cdk2_hardcastle_33_1oiu	cdk2_hardcastle_33_1oiu
	cdk2_hardcastle_26	cdk2_hardcastle_40					cdk2_hardcastle_34_1oiy	cdk2_hardcastle_33_1oiu	cdk2_hardcastle_34_1oiy	cdk2_hardcastle_34_1oiy
	cdk2_hardcastle_27	cdk2_hardcastle_41
		cdk2_hardcastle_42
					31 Ligands	training set 1	training set 2	training set 3	training set 4	training set 5
						cdk2_hardcastle_02_1h1q	cdk2_hardcastle_01	cdk2_hardcastle_01	cdk2_hardcastle_01	cdk2_hardcastle_01
						cdk2_hardcastle_03_1h1s	cdk2_hardcastle_05	cdk2_hardcastle_02_1h1q	cdk2_hardcastle_02_1h1q	cdk2_hardcastle_02_1h1q
						cdk2_hardcastle_04	cdk2_hardcastle_06	cdk2_hardcastle_03_1h1s	cdk2_hardcastle_03_1h1s	cdk2_hardcastle_03_1h1s
						cdk2_hardcastle_05	cdk2_hardcastle_07	cdk2_hardcastle_04	cdk2_hardcastle_04	cdk2_hardcastle_04
						cdk2_hardcastle_06	cdk2_hardcastle_08	cdk2_hardcastle_06	cdk2_hardcastle_05	cdk2_hardcastle_05
						cdk2_hardcastle_07	cdk2_hardcastle_10	cdk2_hardcastle_07	cdk2_hardcastle_07	cdk2_hardcastle_06
						cdk2_hardcastle_09	cdk2_hardcastle_11	cdk2_hardcastle_08	cdk2_hardcastle_08	cdk2_hardcastle_08
						cdk2_hardcastle_10	cdk2_hardcastle_12	cdk2_hardcastle_09	cdk2_hardcastle_09	cdk2_hardcastle_09
						cdk2_hardcastle_11	cdk2_hardcastle_13	cdk2_hardcastle_11	cdk2_hardcastle_10	cdk2_hardcastle_10
						cdk2_hardcastle_12	cdk2_hardcastle_15_1h1r	cdk2_hardcastle_12	cdk2_hardcastle_12	cdk2_hardcastle_11
						cdk2_hardcastle_14	cdk2_hardcastle_16	cdk2_hardcastle_13	cdk2_hardcastle_13	cdk2_hardcastle_13
						cdk2_hardcastle_15_1h1r	cdk2_hardcastle_17	cdk2_hardcastle_14	cdk2_hardcastle_14	cdk2_hardcastle_14
						cdk2_hardcastle_16	cdk2_hardcastle_18	cdk2_hardcastle_16	cdk2_hardcastle_15_1h1r	cdk2_hardcastle_15_1h1r
						cdk2_hardcastle_17	cdk2_hardcastle_20	cdk2_hardcastle_17	cdk2_hardcastle_17	cdk2_hardcastle_16
						cdk2_hardcastle_19	cdk2_hardcastle_21	cdk2_hardcastle_18	cdk2_hardcastle_18	cdk2_hardcastle_18
						cdk2_hardcastle_20	cdk2_hardcastle_22	cdk2_hardcastle_19	cdk2_hardcastle_19	cdk2_hardcastle_19
						cdk2_hardcastle_21	cdk2_hardcastle_23	cdk2_hardcastle_21	cdk2_hardcastle_20	cdk2_hardcastle_20
						cdk2_hardcastle_22	cdk2_hardcastle_25_1oi9	cdk2_hardcastle_22	cdk2_hardcastle_22	cdk2_hardcastle_21
						cdk2_hardcastle_24	cdk2_hardcastle_26	cdk2_hardcastle_23	cdk2_hardcastle_23	cdk2_hardcastle_23
						cdk2_hardcastle_25_1oi9	cdk2_hardcastle_27	cdk2_hardcastle_24	cdk2_hardcastle_24	cdk2_hardcastle_24
						cdk2_hardcastle_26	cdk2_hardcastle_28	cdk2_hardcastle_26	cdk2_hardcastle_25_1oi9	cdk2_hardcastle_25_1oi9
						cdk2_hardcastle_27	cdk2_hardcastle_29	cdk2_hardcastle_27	cdk2_hardcastle_27	cdk2_hardcastle_26
						cdk2_hardcastle_28	cdk2_hardcastle_30	cdk2_hardcastle_29	cdk2_hardcastle_28	cdk2_hardcastle_28
						cdk2_hardcastle_29	cdk2_hardcastle_31	cdk2_hardcastle_30	cdk2_hardcastle_30	cdk2_hardcastle_29
						cdk2_hardcastle_30	cdk2_hardcastle_33_1oiu	cdk2_hardcastle_31	cdk2_hardcastle_31	cdk2_hardcastle_31
						cdk2_hardcastle_32	cdk2_hardcastle_34_1oiy	cdk2_hardcastle_32	cdk2_hardcastle_32	cdk2_hardcastle_32
						cdk2_hardcastle_33_1oiu	cdk2_hardcastle_36	cdk2_hardcastle_34_1oiy	cdk2_hardcastle_33_1oiu	cdk2_hardcastle_33_1oiu
						cdk2_hardcastle_34_1oiy	cdk2_hardcastle_37	cdk2_hardcastle_36	cdk2_hardcastle_36	cdk2_hardcastle_34_1oiy
						cdk2_hardcastle_36	cdk2_hardcastle_39	cdk2_hardcastle_37	cdk2_hardcastle_37	cdk2_hardcastle_37
						cdk2_hardcastle_38	cdk2_hardcastle_40	cdk2_hardcastle_38	cdk2_hardcastle_38	cdk2_hardcastle_38
						cdk2_hardcastle_39	cdk2_hardcastle_41	cdk2_hardcastle_40	cdk2_hardcastle_39	cdk2_hardcastle_39
						cdk2_hardcastle_40	cdk2_hardcastle_42	cdk2_hardcastle_41	cdk2_hardcastle_41	cdk2_hardcastle_40
						cdk2_hardcastle_41	cdk2_hardcastle_43	cdk2_hardcastle_42	cdk2_hardcastle_42	cdk2_hardcastle_42
						cdk2_hardcastle_43	cdk2_hardcastle_44	cdk2_hardcastle_44	cdk2_hardcastle_43	cdk2_hardcastle_43
						cdk2_hardcastle_44	cdk2_hardcastle_45	cdk2_hardcastle_45	cdk2_hardcastle_45	cdk2_hardcastle_44
						cdk2_hardcastle_45	cdk2_hardcastle_46	cdk2_hardcastle_46	cdk2_hardcastle_46	cdk2_hardcastle_46

## Sheet: PTP1B
scaffold 1	scaffold 2	scaffold 3	scaffold 4	scaffold 5	scaffold 6	scaffold 7	scaffold 8		23 Ligands	training set 1	training set 2	training set 3	training set 4	training set 5
ptp1b_wilson_01	ptp1b_wilson_02	ptp1b_wilson_03	ptp1b_wilson_18	ptp1b_wilson_26	ptp1b_wilson_36	ptp1b_wilson_41	ptp1b_wilson_51			ptp1b_wilson_08	ptp1b_wilson_10	ptp1b_wilson_08	ptp1b_wilson_08	ptp1b_wilson_08
		ptp1b_wilson_08	ptp1b_wilson_19_2qbs	ptp1b_wilson_27	ptp1b_wilson_37	ptp1b_wilson_42	ptp1b_wilson_52			ptp1b_wilson_10	ptp1b_wilson_11	ptp1b_wilson_11	ptp1b_wilson_10	ptp1b_wilson_10
		ptp1b_wilson_09	ptp1b_wilson_20	ptp1b_wilson_28	ptp1b_wilson_38	ptp1b_wilson_43	ptp1b_wilson_53			ptp1b_wilson_11	ptp1b_wilson_12	ptp1b_wilson_12	ptp1b_wilson_12	ptp1b_wilson_11
		ptp1b_wilson_10	ptp1b_wilson_21	ptp1b_wilson_29	ptp1b_wilson_39	ptp1b_wilson_44	ptp1b_wilson_54			ptp1b_wilson_12	ptp1b_wilson_13	ptp1b_wilson_13	ptp1b_wilson_13	ptp1b_wilson_13
		ptp1b_wilson_11	ptp1b_wilson_22	ptp1b_wilson_30	ptp1b_wilson_40	ptp1b_wilson_45				ptp1b_wilson_14	ptp1b_wilson_15	ptp1b_wilson_14	ptp1b_wilson_14	ptp1b_wilson_14
		ptp1b_wilson_12	ptp1b_wilson_23_2qbq	ptp1b_wilson_31		ptp1b_wilson_46				ptp1b_wilson_15	ptp1b_wilson_16_2qbr	ptp1b_wilson_16_2qbr	ptp1b_wilson_15	ptp1b_wilson_15
		ptp1b_wilson_13		ptp1b_wilson_32_2qbp		ptp1b_wilson_47				ptp1b_wilson_16_2qbr	ptp1b_wilson_17	ptp1b_wilson_17	ptp1b_wilson_17	ptp1b_wilson_16_2qbr
		ptp1b_wilson_14		ptp1b_wilson_33		ptp1b_wilson_48				ptp1b_wilson_17	ptp1b_wilson_18	ptp1b_wilson_18	ptp1b_wilson_18	ptp1b_wilson_18
		ptp1b_wilson_15		ptp1b_wilson_34		ptp1b_wilson_49				ptp1b_wilson_19_2qbs	ptp1b_wilson_20	ptp1b_wilson_19_2qbs	ptp1b_wilson_19_2qbs	ptp1b_wilson_19_2qbs
		ptp1b_wilson_16_2qbr		ptp1b_wilson_35		ptp1b_wilson_50				ptp1b_wilson_20	ptp1b_wilson_21	ptp1b_wilson_21	ptp1b_wilson_20	ptp1b_wilson_20
		ptp1b_wilson_17								ptp1b_wilson_21	ptp1b_wilson_22	ptp1b_wilson_22	ptp1b_wilson_22	ptp1b_wilson_21
										ptp1b_wilson_22	ptp1b_wilson_23_2qbq	ptp1b_wilson_23_2qbq	ptp1b_wilson_23_2qbq	ptp1b_wilson_23_2qbq
										ptp1b_wilson_28	ptp1b_wilson_27	ptp1b_wilson_27	ptp1b_wilson_27	ptp1b_wilson_27
										ptp1b_wilson_30	ptp1b_wilson_30	ptp1b_wilson_28	ptp1b_wilson_28	ptp1b_wilson_28
										ptp1b_wilson_31	ptp1b_wilson_31	ptp1b_wilson_31	ptp1b_wilson_30	ptp1b_wilson_30
										ptp1b_wilson_32_2qbp	ptp1b_wilson_32_2qbp	ptp1b_wilson_32_2qbp	ptp1b_wilson_32_2qbp	ptp1b_wilson_31
										ptp1b_wilson_34	ptp1b_wilson_33	ptp1b_wilson_33	ptp1b_wilson_33	ptp1b_wilson_33
										ptp1b_wilson_35	ptp1b_wilson_35	ptp1b_wilson_34	ptp1b_wilson_34	ptp1b_wilson_34
													ptp1b_wilson_35	ptp1b_wilson_35
									48 Ligands	training set 1	training set 2	training set 3	training set 4	training set 5
										ptp1b_wilson_02	ptp1b_wilson_01	ptp1b_wilson_01	ptp1b_wilson_01	ptp1b_wilson_01
										ptp1b_wilson_03	ptp1b_wilson_02	ptp1b_wilson_02	ptp1b_wilson_03	ptp1b_wilson_02
										ptp1b_wilson_08	ptp1b_wilson_03	ptp1b_wilson_08	ptp1b_wilson_09	ptp1b_wilson_03
										ptp1b_wilson_09	ptp1b_wilson_08	ptp1b_wilson_09	ptp1b_wilson_10	ptp1b_wilson_08
										ptp1b_wilson_11	ptp1b_wilson_09	ptp1b_wilson_10	ptp1b_wilson_11	ptp1b_wilson_10
										ptp1b_wilson_12	ptp1b_wilson_10	ptp1b_wilson_11	ptp1b_wilson_12	ptp1b_wilson_11
										ptp1b_wilson_13	ptp1b_wilson_12	ptp1b_wilson_13	ptp1b_wilson_14	ptp1b_wilson_12
										ptp1b_wilson_14	ptp1b_wilson_13	ptp1b_wilson_14	ptp1b_wilson_15	ptp1b_wilson_13
										ptp1b_wilson_16_2qbr	ptp1b_wilson_14	ptp1b_wilson_15	ptp1b_wilson_16_2qbr	ptp1b_wilson_15
										ptp1b_wilson_17	ptp1b_wilson_15	ptp1b_wilson_16_2qbr	ptp1b_wilson_17	ptp1b_wilson_16_2qbr
										ptp1b_wilson_18	ptp1b_wilson_17	ptp1b_wilson_18	ptp1b_wilson_18	ptp1b_wilson_17
										ptp1b_wilson_19_2qbs	ptp1b_wilson_19_2qbs	ptp1b_wilson_20	ptp1b_wilson_19_2qbs	ptp1b_wilson_18
										ptp1b_wilson_20	ptp1b_wilson_20	ptp1b_wilson_21	ptp1b_wilson_21	ptp1b_wilson_19_2qbs
										ptp1b_wilson_21	ptp1b_wilson_21	ptp1b_wilson_22	ptp1b_wilson_22	ptp1b_wilson_20
										ptp1b_wilson_23_2qbq	ptp1b_wilson_22	ptp1b_wilson_23_2qbq	ptp1b_wilson_23_2qbq	ptp1b_wilson_22
										ptp1b_wilson_26	ptp1b_wilson_26	ptp1b_wilson_26	ptp1b_wilson_26	ptp1b_wilson_23_2qbq
										ptp1b_wilson_28	ptp1b_wilson_27	ptp1b_wilson_27	ptp1b_wilson_27	ptp1b_wilson_27
										ptp1b_wilson_29	ptp1b_wilson_29	ptp1b_wilson_28	ptp1b_wilson_28	ptp1b_wilson_28
										ptp1b_wilson_30	ptp1b_wilson_30	ptp1b_wilson_30	ptp1b_wilson_29	ptp1b_wilson_29
										ptp1b_wilson_31	ptp1b_wilson_31	ptp1b_wilson_31	ptp1b_wilson_31	ptp1b_wilson_30
										ptp1b_wilson_33	ptp1b_wilson_32_2qbp	ptp1b_wilson_32_2qbp	ptp1b_wilson_32_2qbp	ptp1b_wilson_32_2qbp
										ptp1b_wilson_34	ptp1b_wilson_34	ptp1b_wilson_33	ptp1b_wilson_33	ptp1b_wilson_33
										ptp1b_wilson_35	ptp1b_wilson_35	ptp1b_wilson_35	ptp1b_wilson_34	ptp1b_wilson_34
										ptp1b_wilson_36	ptp1b_wilson_36	ptp1b_wilson_36	ptp1b_wilson_36	ptp1b_wilson_35
										ptp1b_wilson_38	ptp1b_wilson_37	ptp1b_wilson_37	ptp1b_wilson_37	ptp1b_wilson_37
										ptp1b_wilson_39	ptp1b_wilson_39	ptp1b_wilson_38	ptp1b_wilson_38	ptp1b_wilson_38
										ptp1b_wilson_40	ptp1b_wilson_40	ptp1b_wilson_40	ptp1b_wilson_39	ptp1b_wilson_39
										ptp1b_wilson_41	ptp1b_wilson_41	ptp1b_wilson_41	ptp1b_wilson_41	ptp1b_wilson_40
										ptp1b_wilson_43	ptp1b_wilson_42	ptp1b_wilson_42	ptp1b_wilson_42	ptp1b_wilson_42
										ptp1b_wilson_44	ptp1b_wilson_44	ptp1b_wilson_43	ptp1b_wilson_43	ptp1b_wilson_43
										ptp1b_wilson_45	ptp1b_wilson_45	ptp1b_wilson_45	ptp1b_wilson_44	ptp1b_wilson_44
										ptp1b_wilson_46	ptp1b_wilson_46	ptp1b_wilson_46	ptp1b_wilson_46	ptp1b_wilson_45
										ptp1b_wilson_48	ptp1b_wilson_47	ptp1b_wilson_47	ptp1b_wilson_47	ptp1b_wilson_47
										ptp1b_wilson_49	ptp1b_wilson_49	ptp1b_wilson_48	ptp1b_wilson_48	ptp1b_wilson_48
										ptp1b_wilson_50	ptp1b_wilson_50	ptp1b_wilson_50	ptp1b_wilson_49	ptp1b_wilson_49
										ptp1b_wilson_51	ptp1b_wilson_51	ptp1b_wilson_51	ptp1b_wilson_51	ptp1b_wilson_50
										ptp1b_wilson_53	ptp1b_wilson_52	ptp1b_wilson_52	ptp1b_wilson_52	ptp1b_wilson_52
										ptp1b_wilson_54	ptp1b_wilson_54	ptp1b_wilson_53	ptp1b_wilson_53	ptp1b_wilson_53
													ptp1b_wilson_54	ptp1b_wilson_54
