# Supplementary material for: Rapid and accurate estimation of protein–ligand relative binding affinities using site-identification by ligand competitive saturation
Source: Royal Society of Chemistry journal article supplement (doi:10.1039/d1sc01781k), 2021-01-01
Supplement: d1sc01781k6.xlsx [file d1sc01781k6.xlsx]

## Sheet: GAS21 (199 Ligands)
atom type	original	P38	BACE	MCL1	TYK2	JNK1	Thrombin	CDK2	PTP1B
BENC	0.167	0.212357	0.161957	0.155945	0.0758681	0.195991	0.101002	0.247377	0.296008
PRPC	0.333	0.404895	0.58638	0.524342	0.0848817	0.74622	0.379753	0.155211	0.446853
MEOO	1	1.0743			0.3712	1.0627		1.6066
MAMN	1						1.0314
ACEC	1			0.8449					0.5829
GEND	1	1.3012	0.8809	0.2282	1.4663	1.8836	2.0394	0.4619	1.7759
GENA	1	0.9134	0.7018	0.7486	1.0797	0.4875	0.5785	1.4583	1.2603
GEHC	0.333	0.124775	0.493573	0.466666	0.124176	0.165501	0.280319	0.367865	0.683016
*blank entries mean parameter was not optimized

## Sheet: GAX21 (199 Ligands)
atom type	original	P38	BACE	MCL1	TYK2	JNK1	Thrombin	CDK2	PTP1B
BENC	0.167	0.384685	0.166249	0.226736	0.0815461	0.246776	0.146643	0.472677	0.20885
PRPC	0.333	0.421045	1.00956	0.501731	0.123077	0.869463	0.248085	0.368798	0.441891
MEOO	1	0.1952				0.4958		1.4956
MAMN	1						0.5985
ACEC	1			0.4038					1.0408
GEND	1	0.5371	0.7192	0.3328	1.5722	1.9866	1.9805	0.5057	0.369
GENA	1	0.9702	0.7975	0.3019	1.0893	0.2322	0.6784	0.8042	0.9201
GEHC	0.333	0.0778554	0.111921	0.680785	0.0806193	0.557409	0.454778	0.117316	0.0833499
FETX	1				1.5371
TFEC	1			1.1191
FLBX	1	0.2499	1.5216				1.9518		1.2766
CLBX	1	1.6852	0.4556	1.1461	1.0739	0.3376	1.9596	0.5438	0.969
BRBX	1					0.2195	0.9079	0.5806	0.5967
*blank entries mean parameter was not optimized

## Sheet: SS21 (199 Ligands)
atom type	original	P38	BACE	MCL1	TYK2	JNK1	Thrombin	CDK2	PTP1B
BENC	0.167	0.0737973	0.104676	0.309267	0.415112	0.350767	0.193019	0.121877	0.145958
PRPC	0.333	0.46307	0.448751	0.60273	0.147452	0.594405	0.326973	0.4666	0.342091
MEOO	1	1.0415				0.7165		4.2145
FORN	1	0.7399			1.6945	1.9323	0.7895	1.6087	0.5309
FORO	1	0.6984	0.8583		0.709	0.133	1.6478	2.4338	1.03
MAMC	1
MAMN	1						0.5791
ACEC	1			0.1609					1.1421
IMIN	1	1.4176	0.4866	0.1924	0.3475	1.0893		2.7246
IMIH	1	0.1934	0.5033	0.1906				1.424
GENA	1	1.0078	0.8334	1.6327	0.3421	0.2615	1.2749	0.6019	0.9285
GEHC	0.333	0.0657675	0.855544	0.305195	0.289943	0.315584	0.498901	1.35864	0.339227
DMEO	1	0.8227	0.5288	0.1763	1.0946	0.284		1.0702	0.2805
*blank entries mean parameter was not optimized

## Sheet: SX21 (199 Ligands)
atom type	original	P38	BACE	MCL1	TYK2	JNK1	Thrombin	CDK2	PTP1B
BENC	0.167	0.160637	0.168503	0.29038	0.303272	0.136523	0.137508	0.115931	0.136222
PRPC	0.333	0.420279	0.473859	0.471228	0.275924	0.439427	0.157309	0.298768	0.516949
MEOO	1	0.2964				0.8782		1.9691
FORN	1	0.284			1.081	0.9074	1.8159	1.8184	1.4995
FORO	1	0.4051	1.6513		1.1987	0.163	0.8777	2.1826	0.5436
MAMN	1						1.4589
ACEC	1			0.5429					0.7665
IMIN	1	1.1502	0.9305	0.323	0.5608	1.4202		0.8118
IMIH	1		0.3316	0.3085				0.5767
GENA	1	2.0563	0.7049		1.4584	1.6025		0.7986	1.6998
GEHC	0.333	0.766999	0.442357	0.474392	0.192974	0.116683	0.620146	0.22967	0.508857
DMEO	1	0.8061	0.9192	0.3652	0.8122	1.1151		0.3525	0.7979
FETX	1				1.6193
TFEC	1			0.7681
FLBX	1	0.7703	1.6754				0.4963		1.592
CLBX	1	2.0384	1.0049	0.8706	0.5235	0.1815	1.3985	0.9168	1.6
BRBX	1					0.2678	0.676	0.3359	0.9856
*blank entries mean parameter was not optimized

## Sheet: GAS21 (407 Ligands)
atom type	original	P38	BACE	MCL1	TYK2	JNK1	Thrombin	CDK2	PTP1B
BENC	0.167	0.188359	0.126703	0.179458	0.143704	0.303272	0.0503839	0.177955	0.232932
PRPC	0.333	0.221312	0.712121	0.50293	0.307992	0.360672	0.122977	0.0558774	0.384548
MEOO	1	0.9289			0.7985	1.4722	0.4532	0.586	1.8719
MAMC	1						1.8516
MAMN	1					3.077	1.6112
ACEC	1			0.8		1.2674		0.5081	0.8481
GEND	1	0.8468	1.3818	0.216	0.1203	0.6629	1.2255	1.3656	0.6563
GENA	1	1.1314	0.6158	0.724	1.4643	0.9701	1.6751	0.8085	1.0439
GEHC	0.333	0.33966	0.386946	0.504528	0.120713	0.244522	0.2669	0.0585081	0.588511
*blank entries mean parameter was not optimized

## Sheet: GAX21 (407 Ligands)
atom type	original	P38	BACE	MCL1	TYK2	JNK1	Thrombin	CDK2	PTP1B
BENC	0.167	0.34387	0.0528221	0.225851	0.0569303	0.366816	0.140881	0.439628	0.230894
PRPC	0.333	0.426773	0.91535	0.321811	0.411588	0.328571	0.151582	0.163003	0.390043
MEOO	1	0.1545			1.8178	1.4674	0.5981	1.3172	2.2292
MAMC	1						1.9778
MAMN	1					1.1134	1.4954
ACEC	1			1.1369	3.8209	1.8181		2.2077	0.5911
GEND	1	1.099	1.4502	0.3879	0.6348	0.7296	0.9473	2.4133	0.5832
GENA	1	1.1783	0.6729	0.2596	1.1743	0.9657	1.2655	0.8653	0.7495
GEHC	0.333	0.0898434	0.105628	0.48315	0.813985	0.156477	0.180419	0.734098	1.11941
FETX	1				3.0495
TFEC	1			0.6384	0.5584		0.4636
CLEX	1				2.2747
FLBX	1	0.168	3.2184		1.3595		0.8513	0.7439	1.9383
CLBX	1		1.2329	0.7875	1.1777	0.6746	1.8611	2.7283	3.605
BRBX	1			0.8248		0.2916	1.5607	1.5896	1.5863
*blank entries mean parameter was not optimized

## Sheet: SS21 (407 Ligands)
atom type	original	P38	BACE	MCL1	TYK2	JNK1	Thrombin	CDK2	PTP1B
BENC	0.167	0.15369	0.0366565	0.257781	0.0439878	0.272895	0.0719603	0.042251	0.446976
PRPC	0.333	0.312554	0.511288	0.450782	0.747585	0.209091	0.117183	0.353213	0.606859
MEOO	1	0.4628			1.3349	1.6379	0.3773	1.7364
FORN	1	1.7291		0.181	0.5507	0.4278	0.3909	0.3203	1.5116
FORO	1	0.2342	0.2691	0.6369	1.1988	1.9871	1.2595	2.1971	0.5461
MAMC	1						2.5707
MAMN	1						1.8395
ACEC	1			0.8978	2.6772	1.3661		2.0275	0.3215
IMIN	1	0.4917	0.6367	0.1443	1.1099	1.7016		0.4245	2.1621
IMIH	1	0.4946	1.0496	0.5831	1.5501	2.3288		0.3868
GENA	1	2.6277	1.0865	0.9008	1.6356	0.829	4.6123	0.2283	2.5289
GEHC	0.333	0.568631	0.580952	0.471528	0.0733932	0.107259	0.683383	0.0946719	0.659107
DMEO	1	0.2591	0.6968	0.121	0.2968	0.9033	1.5613	0.2341	0.3048
*blank entries mean parameter was not optimized

## Sheet: SX21 (407 Ligands)
atom type	original	P38	BACE	MCL1	TYK2	JNK1	Thrombin	CDK2	PTP1B
BENC	0.167	0.252621	0.790244	0.26887	0.79826	0.361856	0.0868567	0.0742816	0.392116
PRPC	0.333	0.491874	0.517415	0.460539	0.445621	0.229504	0.175191	0.272394	0.565034
MEOO	1	0.1298			1.6826	2.0676	0.2692	1.1919	2.6295
FORN	1	0.8555		0.2398	0.4988	0.4721	1.5469	0.5197	1.0782
FORO	1	0.9194	0.6022	0.2389	1.1186	1.2046	1.0212	1.8788	0.9714
MAMC	1						2.2919
MAMN	1					1.3273	1.384
ACEC	1			0.7125	3.2015	2.2113		2.0264	0.3792
IMIN	1	1.1769	0.3683	0.2761	1.6381	1.4528		0.3151	3.3406
IMIH	1		1.1203	0.5197	3.583	2.0125		0.3151
GENA	1	1.4934	1.1181		0.3466	1.0947		2.1978	2.5414
GEHC	0.333	0.0481851	0.457442	0.464735	0.773659	0.152481	0.198468	0.0913086	1.23536
DMEO	1	1.3082	0.5837	0.2041	0.2675	1.0116	1.7992	0.6604	0.5921
FETX	1				3.2389
TFEC	1			0.7282	0.2867		0.2719		1.3996
CLEX	1				2.7218
FLBX	1	0.4155	1.327		1.6918		1.733	0.2815	1.4772
CLBX	1	0.8048	0.8205	0.9692	0.9886	0.4146	2.3005	0.2798	1.4985
BRBX	1			1.1813		0.229	1.7992		0.887
*blank entries mean parameter was not optimized
